# Supplementary material
Source: publisher figshare collection journal article supplement (https://gsajournals.figshare.com/ndownloader/files/31138498)
Supplement: Supplementary file 1 [file 31138498]

## Sheet: Key
Supplementary Table 3: CrzA targets in CEA17 before and after exposure to HD of CSP
GeneID	Gene Identifier
GeneName	Gene Name
Description	Gene Description
pileup_C	CrzA binding peak intensity in the control sample (CrzA:GFP grown in minimal media)
log10(pvalue)_C	Log10(pvalue) of the CrzA binding peak in the control sample
fold_enrichment_C	Fold enrichment of the CrzA binding peak in the control sample
log10(qvalue)_C	Log10(qvalue) of the CrzA binding peak in the control sample
pileup_csp	CrzA binding peak intensity in the samples exposed to caspofungin (CrzA:GFP grown in minimal media and treated with 2µg/ml for 1 hour)
log10(pvalue)_csp	Log10(pvalue) of the CrzA binding peak in the csp sample
fold_enrichment_csp	Fold enrichment of the CrzA binding peak in the csp sample
log10(qvalue)_csp	Log10(qvalue) of the CrzA binding peak in the csp sample
MEME_predicted_CrzA_binding_site	Presence of the CrzA binding site [GCC(A/T)C] in the gene promoter according to FIMO

## Sheet: Supplementary Table 3 
Supplementary Table 3: CrzA targets in CEA17 before and after exposure to HD of CSP
GeneID	GeneName	Description	pileup_C	log10(pvalue)_C	fold_enrichment_C	log10(qvalue)_C	pileup_csp	log10(pvalue)_csp	fold_enrichment_csp	log10(qvalue)_csp	MEME_predicted_CrzA_binding_site
Afu1g00530	Afu1g00530	Thermoresistant gluconokinase family protein; predicted gene pair with AFUA_4G12050	37	6.0539	2.31425	4.09338	58	7.52907	2.15959	5.66568	no
Afu1g00570	Afu1g00570	Predicted mariner Ant1 transposon-related ORF	90	35.0408	4.99451	31.1423	125	46.3151	4.87994	42.7542	yes
Afu1g01100	Afu1g01100	Protein of unknown function	32	4.5409	2.09691	2.7691	67	14.7122	2.98651	12.3939	no
Afu1g01380	och4	Putative alpha-1,6-mannosyltransferase	32	4.5409	2.09691	2.7691	57	10.033	2.54731	7.98618	no
Afu1g01570	Afu1g01570	Ortholog of A. nidulans FGSC A4 : AN0389, A. niger CBS 513.88 : An04g08610, Neosartorya fischeri NRRL 181 : NFIA_023080, Aspergillus wentii : Aspwe1_0169743 and Aspergillus versicolor : Aspve1_0119805	59	17.1556	3.6452	14.3089	62	12	2.72491	9.83232	no
Afu1g01720	ireA	Transmembrane protein kinase and ribonuclease involved in the unfolded protein response (UPR); under ER stress, activates the main UPR regulator HacA by splicing its mRNA; required for normal virulence	53	12.5321	3.06818	10.0081	94	23.6618	3.39771	20.9296	no
Afu1g02120	Afu1g02120	Ortholog of A. nidulans FGSC A4 : AN0353, Neosartorya fischeri NRRL 181 : NFIA_022530, Aspergillus wentii : Aspwe1_0103055 and Aspergillus versicolor : Aspve1_0048604	39	5.40595	2.1322	3.519	65	12.6532	2.74771	10.449	no
Afu1g02330	Afu1g02330	Ortholog of A. nidulans FGSC A4 : AN0335, A. niger CBS 513.88 : An01g05850, A. oryzae RIB40 : AO090005000867, Aspergillus wentii : Aspwe1_0103633 and Aspergillus sydowii : Aspsy1_0633416	51	11.0858	2.87929	8.671	55	8.8995	2.41588	6.93107	no
Afu1g02870	Afu1g02870	Ortholog(s) have role in negative regulation of cellular response to oxidative stress	68	15.9465	3.13351	13.1828	136	32.7818	3.36775	29.6974	no
Afu1g02900	Afu1g02900	Ortholog(s) have role in pyridoxal phosphate biosynthetic process	52	12.1132	3.02857	9.62142	69	12.4883	2.63952	10.2922	no
Afu1g03040	Afu1g03040	Ortholog(s) have role in hyphal growth, response to cold, response to heat, response to oxidative stress, response to salt stress, sporocarp development involved in sexual reproduction	62	14.2397	3.05825	11.5986	119	33.6003	3.78788	30.4838	no
Afu1g03210	flbD	Myb family transcription factor; A. nidulans ortholog plays a role in conidiophore development; transcript repressed by growth in hypoxia	50	6.37468	2.10744	4.37826	87	11.2247	2.22785	9.10387	no
Afu1g03352	Afu1g03352	Has domain(s) with predicted hydrolase activity	39	7.38477	2.54171	5.28265	64	12.4028	2.73569	10.2111	no
Afu1g03380	Afu1g03380	Ortholog of A. nidulans FGSC A4 : AN0265, A. niger CBS 513.88 : An01g04760, A. oryzae RIB40 : AO090005000763, Aspergillus wentii : Aspwe1_0049645 and Aspergillus sydowii : Aspsy1_0027812	39	7.38477	2.54171	5.28265	81	12.2075	2.40469	10.0284	no
Afu1g03410	Afu1g03410	Has domain(s) with predicted DNA primase activity and role in DNA replication, synthesis of RNA primer	39	7.38477	2.54171	5.28265	64	11.0469	2.54702	8.9363	no
Afu1g03650	Afu1g03650	Ortholog of A. nidulans FGSC A4 : AN4026, A. niger CBS 513.88 : An18g04060, A. oryzae RIB40 : AO090003000980, Aspergillus wentii : Aspwe1_0169329 and Aspergillus sydowii : Aspsy1_0149715	79	20.0671	3.37268	17.0243	123	34.3588	3.76214	31.213	no
Afu1g03660	Afu1g03660	Has domain(s) with predicted hydrolase activity	79	20.0671	3.37268	17.0243	123	34.3588	3.76214	31.213	no
Afu1g04480	Afu1g04480	Ortholog(s) have Sin3-type complex localization	88	29.2451	4.27063	25.6285	116	35.8272	4.0852	32.6234	no
Afu1g04870	Afu1g04870	Ortholog(s) have putrescine transmembrane transporter activity, spermidine transmembrane transporter activity, urea transmembrane transporter activity and role in putrescine transport, spermidine transport, urea transport	44	5.83094	2.11665	3.89388	68	6.43446	1.89665	4.66288	no
Afu1g04960	Afu1g04960	Ortholog of A. nidulans FGSC A4 : AN0409, A. niger CBS 513.88 : An01g04150, A. oryzae RIB40 : AO090003000840, Aspergillus wentii : Aspwe1_0103901 and Aspergillus sydowii : Aspsy1_0028019	61	10.2403	2.49397	7.89104	112	21.9207	2.87678	19.2624	no
Afu1g05040	Afu1g05040	Ortholog(s) have ATPase activator activity, unfolded protein binding activity	85	28.0997	4.23645	24.5421	155	54.7339	4.71584	50.9068	no
Afu1g05110	Afu1g05110	Ortholog(s) have RNA binding activity and role in poly(A)+ mRNA export from nucleus, ribosomal large subunit export from nucleus, ribosomal small subunit export from nucleus	50	11.4183	2.97203	8.97965	60	9.3516	2.38654	7.351	no
Afu1g05150	Afu1g05150	Ortholog(s) have RNA polymerase III general transcription initiation factor activity	54	13.8966	3.27381	11.2791	78	20.5793	3.46962	17.9801	no
Afu1g05360	Afu1g05360	Has domain(s) with predicted catalytic activity and role in metabolic process	54	10.3091	2.66215	7.95454	49	5.12192	1.91718	3.47778	no
Afu1g05370	Afu1g05370	Ortholog of A. nidulans FGSC A4 : AN4062, A. niger CBS 513.88 : An18g04210, A. oryzae RIB40 : AO090009000407, Aspergillus wentii : Aspwe1_0104515 and Aspergillus sydowii : Aspsy1_0057614	54	10.3091	2.66215	7.95454	49	5.12192	1.91718	3.47778	no
Afu1g05480	Afu1g05480	Predicted DDE1 transposon-related ORF	52	11.6936	2.95429	9.23311	78	18.6931	3.22449	16.1817	no
Afu1g05790	Afu1g05790	Putative GPI-anchored protein	57	10.8017	2.66544	8.40787	83	12.6706	2.42634	10.4655	no
Afu1g05810	Afu1g05810	Has domain(s) with predicted role in retrograde vesicle-mediated transport, Golgi to ER	32	3.76931	1.91415	2.12796	77	18.8266	3.26907	16.3094	no
Afu1g05830	Afu1g05830	Ortholog(s) have extracellular region localization	32	3.76931	1.91415	2.12796	77	18.8266	3.26907	16.3094	no
Afu1g06030	Afu1g06030	Ortholog(s) have role in endosomal transport and AP-1 adaptor complex, endosome localization	48	9.9663	2.77149	7.64	66	13.2385	2.8057	11.0011	no
Afu1g06320	Afu1g06320	Has domain(s) with predicted integral component of membrane localization	45	10.0445	2.88582	7.71208	48	6.44056	2.15204	4.6647	no
Afu1g06440	Afu1g06440	Has domain(s) with predicted role in transmembrane transport and integral component of membrane localization	61	15.9116	3.35498	13.1505	74	16.1568	3.0024	13.7648	no
Afu1g06550	Afu1g06550	Has domain(s) with predicted role in transmembrane transport and integral component of membrane localization	95	39.6627	5.40541	35.5417	109	38.5638	4.61409	35.2614	no
Afu1g06560	Afu1g06560	Has domain(s) with predicted hydrolase activity, hydrolyzing O-glycosyl compounds activity and role in carbohydrate metabolic process	95	39.6627	5.40541	35.5417	109	38.5638	4.61409	35.2614	yes
Afu1g06580	hel10	Ortholog of A. nidulans FGSC A4 : AN4252, AN10165, A. fumigatus Af293 : Afu1g11910, A. niger CBS 513.88 : An18g05640, An08g04120 and A. oryzae RIB40 : AO090001000456, AO090001000373	48	7.67036	2.36258	5.54257	139	36.5615	3.60825	33.3319	no
Afu1g06670	Afu1g06670	Transcript up-regulated in conidia exposed to neutrophils	54	9.79933	2.57974	7.48637	64	7.76704	2.10902	5.88409	no
Afu1g06700	casA	Predicted metacaspase, an aspartate-specific cysteine protease involved in apoptosis; mutants show growth defects under conditions of ER stress	54	9.79933	2.57974	7.48637	64	10.675	2.49616	8.58792	no
Afu1g06770	Afu1g06770	40S ribosomal protein S26	79	25.3743	4.09836	21.9674	107	32.4787	4	29.4071	yes
Afu1g06900	crzA	C2H2-type zinc finger transcription factor involved in calcium ion homeostasis; involved in regulation of conidial germination, hyphal growth, and virulence; mutants are sensitive to calcium and manganese ions	36	5.82019	2.2896	3.88402	80	18.4873	3.14685	15.9848	yes
Afu1g06920	Afu1g06920	Ortholog(s) have role in conidiophore development, hyphal growth	45	5.75505	2.08522	3.82549	79	12.499	2.46609	10.3023	yes
Afu1g06980	Afu1g06980	Ortholog(s) have structural constituent of ribosome activity and mitochondrial small ribosomal subunit localization	58	14.7633	3.27414	12.0845	103	30.5795	3.91272	27.5835	no
Afu1g07110	Afu1g07110	Ortholog of A. nidulans FGSC A4 : AN5152, A. niger CBS 513.88 : An07g09650, A. oryzae RIB40 : AO090012000963, Aspergillus wentii : Aspwe1_0028295 and Aspergillus sydowii : Aspsy1_0091614	36	4.47563	1.99784	2.71906	73	12.5052	2.56588	10.3082	no
Afu1g07200	Afu1g07200	Has domain(s) with predicted catalytic activity, heme binding, oxidoreductase activity	55	6.26447	2.01729	4.27927	53	4.64823	1.79641	3.06146	no
Afu1g07240	Afu1g07240	Ortholog of Aspergillus tubingensis : Asptu1_0168895, Asptu1_0198708, Aspergillus glaucus : Aspgl1_0030723, Aspgl1_0067707, Aspgl1_0158328 and Aspergillus kawachii : Aspka1_0179143	49	10.29	2.79955	7.93693	58	9.04366	2.37903	7.06522	no
Afu1g07250	Afu1g07250	Ortholog(s) have calmodulin binding activity and role in lysosomal microautophagy, polyphosphate metabolic process, protein localization, vacuolar transport, vacuole fusion, non-autophagic	52	11.1461	2.85868	8.72721	96	23.8182	3.36572	21.08	no
Afu1g07430	Afu1g07430	Ortholog of A. nidulans FGSC A4 : AN5128, A. niger CBS 513.88 : An07g09970, A. oryzae RIB40 : AO090012000994, Neosartorya fischeri NRRL 181 : NFIA_017320 and Aspergillus wentii : Aspwe1_0069020	53	6.69434	2.11102	4.66395	87	17.0993	2.83505	14.6612	no
Afu1g07470	atg8	Protein involved in autophagy; GFP-atg8 used as a marker of autophagosome delivery into the vacuole	70	14.0463	2.82194	11.4179	87	18.2709	2.96296	15.779	yes
Afu1g07620	Afu1g07620	Has domain(s) with predicted endonuclease activity and role in DNA repair	58	14.9155	3.29978	12.2258	79	16.7815	2.96296	14.3585	yes
Afu1g08800	Afu1g08800	Ortholog(s) have 3-hydroxyphenylacetate 6-hydroxylase activity	85	24.9047	3.80868	21.5313	88	17.4535	2.85439	14.9986	no
Afu1g09130	Afu1g09130	Protein of unknown function identified by mass spectrometry	40	6.77559	2.3865	4.73703	71	13.1832	2.68857	10.9503	no
Afu1g09530	Afu1g09530	Ortholog of A. nidulans FGSC A4 : AN10181, A. niger CBS 513.88 : An08g01090, A. oryzae RIB40 : AO090012000919, Neosartorya fischeri NRRL 181 : NFIA_016080 and Aspergillus wentii : Aspwe1_0036341	47	5.8537	2.06897	3.91422	56	3.63512	1.61748	2.17917	yes
Afu1g09540	Afu1g09540	Ortholog(s) have GTPase regulator activity, mRNA binding activity	66	13.9878	2.91051	11.3627	88	14.7934	2.57523	12.471	yes
Afu1g09580	Afu1g09580	Has domain(s) with predicted plasma membrane localization	84	28.7641	4.37243	25.1743	155	57.6544	4.96815	53.7226	yes
Afu1g09730	Afu1g09730	Has domain(s) with predicted catalytic activity and membrane localization	41	6.44364	2.29508	4.44061	80	14.2204	2.6436	11.93	no
Afu1g10060	Afu1g10060	Ortholog of A. nidulans FGSC A4 : AN11935, A. oryzae RIB40 : AO090038000429, Aspergillus wentii : Aspwe1_0168733, Aspergillus sydowii : Aspsy1_0126887 and Aspergillus terreus NIH2624 : ATET_00179	33	4.77197	2.12766	2.97117	58	10.4701	2.59123	8.395	no
Afu1g10295	Afu1g10295	Ortholog(s) have nucleosome-dependent ATPase activity	50	7.03507	2.21546	4.96859	64	12.7167	2.78015	10.5094	no
Afu1g10380	nrps1	Non-ribosomal peptide synthetase (NRPS); essential for fumigaclavine C biosynthesis; mutant displays altered conidial surface morphology and hydrophilicity	71	13.4056	2.71698	10.8208	104	18.1165	2.66092	15.6313	no
Afu1g10575	Afu1g10575	Protein of unknown function	65	13.9112	2.92553	11.2927	103	19.4953	2.80022	16.947	no
Afu1g10580	Afu1g10580	Has domain(s) with predicted DNA binding, DNA-binding transcription factor activity, sequence-specific DNA binding activity and role in regulation of transcription, DNA-templated	65	13.9112	2.92553	11.2927	103	19.4953	2.80022	16.947	no
Afu1g10600	Afu1g10600	Ortholog of A. nidulans FGSC A4 : AN1219, A. niger CBS 513.88 : An08g02600, A. oryzae RIB40 : AO090038000362, Aspergillus wentii : Aspwe1_0095261 and Aspergillus sydowii : Aspsy1_0025527	140	56.7408	5.4023	52.0701	151	51.4507	4.54817	47.7358	no
Afu1g10870	Afu1g10870	Ortholog(s) have cyanamide hydratase activity and role in cyanamide metabolic process	84	29.0492	4.41329	25.4415	169	61.3536	4.87106	57.2791	yes
Afu1g10880	pmcA	Putative P-type calcium ATPase; calcium induced; essential for virulence	84	29.0492	4.41329	25.4415	169	61.3536	4.87106	57.2791	no
Afu1g10930	Afu1g10930	Putative ammonium transporter; transcript downregulated in response to voriconazole	76	13.7921	2.66621	11.1808	96	12.1749	2.22375	9.99767	no
Afu1g11535	Afu1g11535	Ortholog of S. cerevisiae : YDR286C, A. nidulans FGSC A4 : AN11843, Aspergillus wentii : Aspwe1_0040556, Aspergillus sydowii : Aspsy1_0083601 and Aspergillus carbonarius ITEM 5010 : Acar5010_202812	49	9.14823	2.59605	6.88986	78	16.5793	2.96102	14.1664	no
Afu1g11580	Afu1g11580	Major facilitator superfamily (MFS) quinate transporter; higher expression in 48 h biofilm vs planktonic cells	38	6.94531	2.47817	4.88673	61	11.8237	2.72299	9.66616	no
Afu1g11590	Afu1g11590	Ortholog(s) have quinate 3-dehydrogenase (NAD+) activity, shikimate 3-dehydrogenase (NADP+) activity and role in quinate catabolic process	38	6.94531	2.47817	4.88673	61	11.8237	2.72299	9.66616	no
Afu1g11880	Afu1g11880	Has domain(s) with predicted acetoacetate-CoA ligase activity, catalytic activity and role in lipid metabolic process, metabolic process	48	8.57312	2.52058	6.36378	95	25.887	3.61991	23.0733	no
Afu1g11900	gprG	Putative G-protein coupled receptor; has a PQ loop repeat	60	14.4724	3.15735	11.8156	74	15.2521	2.88684	12.905	no
Afu1g11920	Afu1g11920	Ortholog(s) have role in establishment or maintenance of cell polarity and cell tip localization	55	10.0596	2.5974	7.72591	58	6.72143	2.04435	4.92405	no
Afu1g12230	Afu1g12230	Ortholog of A. oryzae RIB40 : AO090023000461, Neosartorya fischeri NRRL 181 : NFIA_013280, Aspergillus fumigatus A1163 : AFUB_011700 and Aspergillus clavatus NRRL 1 : ACLA_023230	49	10.7147	2.87687	8.32957	51	6.11688	2.05047	4.3712	no
Afu1g12250	rcfB	Mitochondrial hypoxia response domain protein; protein and transcript levels downregulated by caspofungin treatmen	59	13.9871	3.11203	11.362	62	10.5223	2.51397	8.44403	yes
Afu1g12490	veA	Sexual development regulator; role in negative regulation of conidiation; expression activated by AbaA	54	9.13018	2.47302	6.87307	103	22.9634	3.12688	20.2604	yes
Afu1g12500	Afu1g12500	Ortholog of Aspergillus fumigatus A1163 : AFUB_011970	54	9.13018	2.47302	6.87307	103	22.9634	3.12688	20.2604	no
Afu1g12530	Afu1g12530	Ortholog(s) have delta12-fatty acid dehydrogenase activity and role in asexual sporulation resulting in formation of a cellular spore, unsaturated fatty acid biosynthetic process	106	33.2525	4.11538	29.4374	144	43.1248	4.03002	39.6636	no
Afu1g12830	niaD	Nitrate reductase	117	22.1341	2.82162	18.948	168	35.9312	3.12038	32.7245	no
Afu1g13050	Afu1g13050	Has domain(s) with predicted nucleic acid binding activity	53	11.6931	2.92208	9.23267	62	9.8317	2.4175	7.79866	no
Afu1g13510	facB	Putative C6 transcription factor with a predicted role in acetate metabolism; transcript up-regulated in conidia exposed to neutrophils	67	17.417	3.37972	14.5547	64	9.19322	2.29682	7.20293	no
Afu1g13520	Afu1g13520	SET domain protein; transcript up-regulated in conidia exposed to neutrophils	67	17.417	3.37972	14.5547	64	9.19322	2.29682	7.20293	no
Afu1g13800	Afu1g13800	MFS multidrug transporter	58	10.2236	2.55411	7.87751	101	24.0503	3.27553	21.3033	no
Afu1g13970	Afu1g13970	Putative major facilitator superfamily (MFS) transporter	75	15.2102	2.85929	12.4987	116	24.0993	3	21.3502	no
Afu1g13980	Afu1g13980	Ortholog of A. nidulans FGSC A4 : AN2186, AN10116, A. niger CBS 513.88 : An08g07120, An12g09760, An05g02480, An12g10180 and A. oryzae RIB40 : AO090010000355, AO090010000554	113	31.33	3.7182	27.6051	146	32.1695	3.16537	29.1102	no
Afu1g13990	Afu1g13990	Protein of unknown function; SrbA-regulated during hypoxia	79	15.4056	2.79916	12.6802	109	17.9503	2.58095	15.472	no
Afu1g14140	Afu1g14140	Has domain(s) with predicted dolichyl-phosphate-mannose-glycolipid alpha-mannosyltransferase activity and role in GPI anchor biosynthetic process	49	10.3074	2.80269	7.95304	139	54.3508	5.19673	50.5362	no
Afu1g14280	Afu1g14280	Ortholog(s) have role in cellular response to pH and nucleus localization	49	7.6428	2.33645	5.51765	96	20.958	3.06574	18.3417	no
Afu1g14340	Afu1g14340	Putative metalloreductase	35	4.43818	2.00893	2.687	65	11.0135	2.52294	8.90489	no
Afu1g14350	Afu1g14350	Has domain(s) with predicted oxidoreductase activity and role in metabolic process	35	4.43818	2.00893	2.687	65	11.0135	2.52294	8.90489	yes
Afu1g14760	Afu1g14760	Predicted DDE1 transposon-related ORF	87	27.0844	4.02194	23.5754	121	35.8543	3.95078	32.6494	no
Afu1g14830	Afu1g14830	Protein of unknown function; calcium induced	34	5.16081	2.19298	3.30702	96	27.2137	3.74228	24.3516	no
Afu1g15010	Afu1g15010	Has domain(s) with predicted catalytic activity, transcription factor binding activity, role in metabolic process and nucleus localization	36	6.09852	2.35108	4.12932	67	12.5398	2.68775	10.3407	no
Afu1g15180	Afu1g15180	Ortholog of A. nidulans FGSC A4 : AN4122, AN2881, AN10123, AN0867, A. fumigatus Af293 : Afu1g13860, Afu3g11650 and A. niger CBS 513.88 : An08g07010, An02g07440, An01g13480	33	3.82147	1.90797	2.17235	65	11.1865	2.5463	9.06773	no
Afu1g15190	Afu1g15190	Ortholog of Aspergillus fumigatus A1163 : AFUB_014740	33	3.82147	1.90797	2.17235	65	11.1865	2.5463	9.06773	yes
Afu1g15200	Afu1g15200	Ortholog of A. nidulans FGSC A4 : AN3519, AN2646, AN0587, AN0866, AN7370 and A. fumigatus Af293 : Afu3g03790, Afu4g14040, Afu5g06900, Afu7g08575	51	7.67203	2.30088	5.54408	148	43.9622	4.00753	40.4762	no
Afu1g15290	Afu1g15290	Ortholog of A. nidulans FGSC A4 : AN6924, AN5943, AN8512, AN8548, AN0857, AN8661, AN4642 and A. fumigatus Af293 : Afu3g00850, Afu4g08850, Afu7g00920	68	11.6922	2.55556	9.2319	113	22.2931	2.8934	19.619	no
Afu1g15820	Afu1g15820	Putative fatty acid hydroxylase with a possible role in the hydroxylation of a very long-chain fatty acid; sphingolipid biosynthesis	59	13.1727	2.98211	10.6027	55	5.94013	1.96906	4.21315	no
Afu1g16564	Afu1g16564	Ortholog of A. nidulans FGSC A4 : AN11896, Neosartorya fischeri NRRL 181 : NFIA_008860, Aspergillus versicolor : Aspve1_0275963 and Aspergillus clavatus NRRL 1 : ACLA_019010	53	13.6526	3.26877	11.0509	50	6.64723	2.1519	4.85544	no
Afu1g16840	Afu1g16840	TCTP family protein	59	16.66	3.55872	13.8472	66	13.952	2.90546	11.6767	no
Afu1g16970	Afu1g16970	Ortholog(s) have GTPase activity and role in Golgi to plasma membrane protein transport, intracellular protein transport, protein localization to Golgi apparatus, response to endoplasmic reticulum stress	48	10.5109	2.87222	8.14128	53	8.35846	2.37164	6.42929	no
Afu1g17180	Afu1g17180	Putative pyridine nucleotide-disulphide oxidoreductase	58	12.0134	2.82838	9.52874	84	15.6903	2.73664	13.3212	no
Afu1g17190	sidI	Putative long-chain-fatty-acid-CoA ligase; mevalonyl-CoA ligase; PTS2-dependent peroxisomal localization	63	14.423	3.05635	11.7693	71	9.82372	2.27273	7.79109	no
Afu1g17200	sidC	Putative non-ribosomal peptide synthetase (NRPS) involved in ferricrocin siderophore biosynthesis; expression is up-regulated by iron starvation and downregulated under iron-replete conditions	63	14.423	3.05635	11.7693	71	9.82372	2.27273	7.79109	no
Afu1g17350	Afu1g17350	Ortholog of A. oryzae RIB40 : AO090020000692, Neosartorya fischeri NRRL 181 : NFIA_008000, Aspergillus fumigatus A1163 : AFUB_016720 and Aspergillus clavatus NRRL 1 : ACLA_018150	49	10.9894	2.9274	8.58229	74	14.3664	2.77572	12.068	yes
Afu2g00740	Afu2g00740	Ortholog of A. oryzae RIB40 : AO090701000367, Aspergillus flavus NRRL 3357 : AFL2T_06000, Neosartorya fischeri NRRL 181 : NFIA_033010 and Aspergillus wentii : Aspwe1_0029685	44	9.73345	2.85943	7.42572	65	13.7234	2.89867	11.4594	no
Afu2g00770	Afu2g00770	Has domain(s) with predicted FAD binding, oxidoreductase activity and role in metabolic process	102	38.6554	4.91412	34.5784	87	24.2218	3.65752	21.468	no
Afu2g01050	Afu2g01050	Ortholog(s) have protein transporter activity, unfolded protein binding activity and role in protein import into mitochondrial inner membrane, protein import into mitochondrial outer membrane, regulation of growth rate	41	6.23078	2.25322	4.24896	51	6.0262	2.03602	4.29212	no
Afu2g01060	Afu2g01060	Has domain(s) with predicted role in signal transduction and intracellular localization	41	6.23078	2.25322	4.24896	51	6.0262	2.03602	4.29212	no
Afu2g01080	Afu2g01080	Ortholog of A. nidulans FGSC A4 : AN7651, A. niger CBS 513.88 : An10g00470, A. oryzae RIB40 : AO090701000377, Aspergillus wentii : Aspwe1_0113772 and Aspergillus sydowii : Aspsy1_1029216	36	5.56814	2.2343	3.66331	68	12.6613	2.68274	10.4567	no
Afu2g01140	Afu2g01140	Predicted adhesin-like protein; ortholog of A. nidulans AN7654	55	10.3527	2.644	7.99526	125	25.3177	2.96192	22.5244	no
Afu2g01190	Afu2g01190	Has domain(s) with predicted DNA binding, DNA-binding transcription factor activity, copper ion binding activity, role in regulation of transcription, DNA-templated and nucleus localization	59	16.3467	3.50467	13.5541	81	18.1216	3.07808	15.6362	yes
Afu2g01200	Afu2g01200	Ortholog(s) have role in clathrin-dependent endocytosis and actin cortical patch localization	72	21.5264	3.814	18.3831	91	22.4769	3.3406	19.7944	no
Afu2g01610	Afu2g01610	Ortholog of A. nidulans FGSC A4 : AN7690, A. niger CBS 513.88 : An03g04840, A. oryzae RIB40 : AO090701000787, Aspergillus wentii : Aspwe1_0112969 and Aspergillus sydowii : Aspsy1_0058707	47	6.89776	2.2493	4.84771	50	3.7911	1.68874	2.3165	no
Afu2g01700	Afu2g01700	Ortholog(s) have AMP-activated protein kinase activity, ARF guanyl-nucleotide exchange factor activity	47	6.89776	2.2493	4.84771	74	14.7685	2.82592	12.4474	no
Afu2g01870	chsA	Putative class I chitin synthase; does not play a direct role in the cell wall stress response	44	8.64197	2.64395	6.42646	115	35.6203	4.09315	32.4239	no
Afu2g01880	ltpA	Has domain(s) with predicted protein tyrosine phosphatase activity and role in protein dephosphorylation	44	8.64197	2.64395	6.42646	115	35.6203	4.09315	32.4239	no
Afu2g02180	Afu2g02180	Ortholog of A. nidulans FGSC A4 : AN4598, A. niger CBS 513.88 : An07g06700, A. oryzae RIB40 : AO090011000495, Aspergillus wentii : Aspwe1_0024925 and Aspergillus sydowii : Aspsy1_1102655	59	11.2833	2.69058	8.85301	84	14.0499	2.5587	11.7699	no
Afu2g02190	Afu2g02190	Ortholog(s) have role in chromatin silencing at centromere, cleavage in ITS2 between 5.8S rRNA and LSU-rRNA of tricistronic rRNA transcript (SSU-rRNA, 5.8S rRNA, LSU-rRNA)	59	11.2833	2.69058	8.85301	68	14.61	2.9462	12.2986	no
Afu2g02690	Afu2g02690	Ortholog(s) have role in positive regulation of transcription from RNA polymerase II promoter involved in cellular response to chemical stimulus	55	13.4625	3.16027	10.8725	89	22.9175	3.443	20.2164	no
Afu2g02700	Afu2g02700	Ortholog of A. nidulans FGSC A4 : AN4559, A. niger CBS 513.88 : An07g07020, Aspergillus wentii : Aspwe1_0036726, Aspergillus sydowii : Aspsy1_0047078 and Aspergillus terreus NIH2624 : ATET_06907	55	13.4625	3.16027	10.8725	89	22.9175	3.443	20.2164	no
Afu2g02730	Afu2g02730	Ortholog of A. nidulans FGSC A4 : AN4542, A. niger CBS 513.88 : An07g07060, A. oryzae RIB40 : AO090026000848, Aspergillus wentii : Aspwe1_0168873 and Aspergillus sydowii : Aspsy1_0091100	93	29.6921	4.13732	26.0539	52	4.16559	1.73089	2.63534	no
Afu2g02760	dspD	Ortholog(s) have role in regulation of spore germination	47	7.4112	2.33918	5.30679	112	22.9515	2.96588	20.2489	no
Afu2g02770	Afu2g02770	Ortholog of A. nidulans FGSC A4 : AN4545, A. oryzae RIB40 : AO090026000849, Aspergillus wentii : Aspwe1_0105973, Aspergillus sydowii : Aspsy1_0059271 and Aspergillus terreus NIH2624 : ATET_09613	47	7.4112	2.33918	5.30679	112	22.9515	2.96588	20.2489	no
Afu2g02970	Afu2g02970	Ortholog of Aspergillus fumigatus A1163 : AFUB_020030	40	7.70737	2.57862	5.57628	54	4.89305	1.82361	3.2762	no
Afu2g02980	Afu2g02980	Has domain(s) with predicted ER retention sequence binding activity, role in protein retention in ER lumen and integral component of membrane localization	55	12.2292	2.95047	9.72911	78	16.6706	2.97216	14.2533	no
Afu2g03120	utr2	Putative cell wall glucanase; transcript induced by exposure to human airway epithelial cells	48	8.06104	2.43056	5.89725	73	12.1458	2.52215	9.97011	no
Afu2g03430	Afu2g03430	Has domain(s) with predicted DNA binding, DNA-binding transcription factor activity, RNA polymerase II-specific, zinc ion binding activity and role in regulation of transcription, DNA-templated, transcription, DNA-templated	44	9.65899	2.8445	7.35827	72	17.2918	3.2061	14.8448	no
Afu2g03440	Afu2g03440	Ortholog of A. nidulans FGSC A4 : AN4488, A. niger CBS 513.88 : An07g07910, A. oryzae RIB40 : AO090120000243, Aspergillus wentii : Aspwe1_0051514 and Aspergillus sydowii : Aspsy1_0163318	44	9.65899	2.8445	7.35827	72	17.2918	3.2061	14.8448	no
Afu2g03450	Afu2g03450	Ortholog of A. nidulans AN4487; calcium induced	42	8.07996	2.59349	5.91446	74	16.8235	3.08896	14.3988	no
Afu2g03500	Afu2g03500	Has domain(s) with predicted transmembrane transporter activity, role in transmembrane transport and integral component of membrane localization	57	12.4331	2.92339	9.91634	81	13.2764	2.52153	11.0364	no
Afu2g03730	Afu2g03730	Putative high affinity copper transporter; transcript up-regulated in hyphae upon exposure to neutrophils	42	5.97778	2.18274	4.02471	70	13.4145	2.7392	11.1679	no
Afu2g03850	Afu2g03850	Ortholog of A. nidulans FGSC A4 : AN3802, A. niger CBS 513.88 : An07g08470, A. oryzae RIB40 : AO090005001512, Aspergillus wentii : Aspwe1_0051551 and Aspergillus sydowii : Aspsy1_0088749	61	12.245	2.78526	9.74375	78	13.3758	2.5817	11.1313	no
Afu2g03860	zrfB	Low affinity plasma membrane zinc transporter; induced by zinc depletion, ZafA-dependent; overexpression decreases zinc uptake, heme biosynthesis and triacetylfusarinine C (TAFC) siderophore production; induced in neutrophil-exposed conidia	61	12.245	2.78526	9.74375	78	13.3758	2.5817	11.1313	no
Afu2g04000	Afu2g04000	Ortholog(s) have metal ion binding, misfolded protein binding, peptide-N4-(N-acetyl-beta-glucosaminyl)asparagine amidase activity, structural constituent of cell wall activity	85	23.084	3.57737	19.8294	130	33.9895	3.57728	30.8579	no
Afu2g04070	Afu2g04070	Has domain(s) with predicted role in transmembrane transport and integral component of membrane localization	82	19.7241	3.24726	16.7085	134	31.29	3.28627	28.2652	no
Afu2g04095	Afu2g04095	Ortholog of A. nidulans FGSC A4 : AN5225, A. fumigatus Af293 : Afu4g04605, A. niger CBS 513.88 : An13g04060, An07g08820 and A. oryzae RIB40 : AO090206000029	53	11.4209	2.8754	8.98193	86	18.3976	2.99793	15.8992	no
Afu2g04620	bipA	Hsp70 chaperone; protein enriched in dormant conidia	66	17.8133	3.4751	14.923	84	21.0613	3.35703	18.4406	no
Afu2g04720	Afu2g04720	Ortholog(s) have thiol-dependent ubiquitin-specific protease activity	49	9.94962	2.73823	7.6249	74	16.4391	3.0389	14.033	no
Afu2g04750	Afu2g04750	Ortholog of A. nidulans FGSC A4 : AN2070, A. niger CBS 513.88 : An11g04410, A. oryzae RIB40 : AO090003000278, Aspergillus wentii : Aspwe1_0718370 and Aspergillus sydowii : Aspsy1_0142154	57	14.3906	3.24748	11.7391	75	16.3592	3.00395	13.9566	no
Afu2g04760	Afu2g04760	Ortholog(s) have Cul3-RING ubiquitin ligase complex localization	39	5.98339	2.24972	4.02969	65	10.4149	2.44264	8.34478	no
Afu2g04770	Afu2g04770	Ortholog(s) have role in autophagy, protein secretion	39	5.98339	2.24972	4.02969	65	10.4149	2.44264	8.34478	no
Afu2g05040	Afu2g05040	Protein involved in glycosylphosphatidylinositol (GPI)-anchor biosynthesis and remodeling	89	25.735	3.78151	22.3066	90	19.6152	3.04756	17.0609	yes
Afu2g05250	rfeD	Putative transcription factor; transcript up-regulated in conidia exposed to neutrophils	48	8.00603	2.42095	5.84702	51	5.07833	1.88542	3.43831	no
Afu2g05325	Afu2g05325	Has domain(s) with predicted role in transmembrane transport and integral component of membrane localization	67	17.0193	3.32031	14.1818	106	25.6379	3.32505	22.833	no
Afu2g05830	acuK	Putative transcription factor involved in regulation of gluconeogenesis and acquisition of iron; required for virulence	59	12.9126	2.94118	10.3607	56	6.08349	1.97779	4.34055	no
Afu2g06100	Afu2g06100	Ortholog of A. nidulans FGSC A4 : AN7443, A. niger CBS 513.88 : An02g14710, A. oryzae RIB40 : AO090001000726, Aspergillus wentii : Aspwe1_0110234 and Aspergillus sydowii : Aspsy1_0152786	109	42.4575	5.08318	38.1756	155	56.4486	4.86284	52.5593	no
Afu2g06120	Afu2g06120	Ortholog of A. nidulans FGSC A4 : AN7433, A. niger CBS 513.88 : An02g14760, Aspergillus wentii : Aspwe1_0110312, Aspergillus sydowii : Aspsy1_0153514 and Aspergillus terreus NIH2624 : ATET_05606	109	42.4575	5.08318	38.1756	62	11.4444	2.64484	9.30992	no
Afu2g07620	Afu2g07620	Cystathionine beta-synthase; transcript induced by exposure to human airway epithelial cells	78	12.9144	2.52881	10.3624	76	16.0301	2.93893	13.6439	no
Afu2g07730	Afu2g07730	Has domain(s) with predicted phospholipid binding activity, role in cortical protein anchoring and cell cortex localization	61	11.7017	2.70506	9.24047	74	13.4859	2.66714	11.2361	no
Afu2g07830	Afu2g07830	Ortholog of Neosartorya fischeri NRRL 181 : NFIA_083540, Aspergillus fumigatus A1163 : AFUB_023860 and Aspergillus clavatus NRRL 1 : ACLA_079800	43	8.53587	2.6538	6.32985	126	43.8063	4.58484	40.3251	yes
Afu2g07860	Afu2g07860	Ortholog of Aspergillus fumigatus A1163 : AFUB_023880	43	8.53587	2.6538	6.32985	126	43.8063	4.58484	40.3251	no
Afu2g08280	maeA	Putative NADP-dependent malic enzyme	56	13.4807	3.12843	10.8895	69	14.3641	2.88779	12.0659	no
Afu2g08340	Afu2g08340	Ortholog of A. nidulans FGSC A4 : AN6172, A. niger CBS 513.88 : An05g00970, A. oryzae RIB40 : AO090011000871, Aspergillus wentii : Aspwe1_0176098 and Aspergillus sydowii : Aspsy1_0151670	42	7.75937	2.52941	5.62371	57	10.033	2.54731	7.98618	no
Afu2g08350	Afu2g08350	Has domain(s) with predicted role in transmembrane transport and integral component of membrane localization	68	16.6635	3.2364	13.8503	57	10.033	2.54731	7.98618	no
Afu2g08360	pyrG	Orotidine 5'-monophosphate decarboxylase	54	9.47349	2.52757	7.18809	94	18.6957	2.87356	16.1842	no
Afu2g08690	Afu2g08690	Ortholog(s) have role in mitochondrion organization, nuclear migration, nucleus organization, spore germination, syncytium formation by plasma membrane fusion	42	5.14294	2.02448	3.29145	73	13.552	2.69483	11.2989	no
Afu2g08780	Afu2g08780	Has domain(s) with predicted ARF guanyl-nucleotide exchange factor activity, phospholipid binding activity and role in regulation of ARF protein signal transduction	52	12.712	3.13609	10.1746	75	15.5423	2.90076	13.1804	no
Afu2g08800	Afu2g08800	Ortholog(s) have L-aspartate transmembrane transporter activity, L-glutamate transmembrane transporter activity and role in L-aspartate transmembrane transport, L-glutamate transmembrane transport, cellular response to drug	52	10.0656	2.67407	7.73144	89	17.35	2.82486	14.9002	no
Afu2g09040	vtc4	Putative vacuolar transporter chaperone, phoB-regulated	43	6.89555	2.33546	4.84571	64	10.7597	2.50772	8.66721	no
Afu2g09060	Afu2g09060	Ortholog(s) have 3'-5' DNA/RNA helicase activity, ATP-dependent four-way junction helicase activity, DNA replication origin binding, chromatin binding and single-stranded DNA binding, more	76	24.968	4.16667	21.5899	112	36.5543	4.28355	33.3248	no
Afu2g09290	hsp60	Putative antigenic mitochondrial protein; reacts with rabbit immunosera exposed to A. fumigatus conidia; hypoxia induced protein	50	10.9909	2.89444	8.58368	48	4.68681	1.85747	3.09611	no
Afu2g09510	Afu2g09510	Protein of unknown function; transcript downregulated in response to voriconazole	49	3.67204	1.67785	2.04613	132	31.3074	3.32168	28.2821	no
Afu2g09630	Afu2g09630	Protein of unknown function; transcript induced by voriconazole	123	62.6399	6.98985	57.743	161	70.3129	5.92538	65.9704	no
Afu2g09820	Afu2g09820	Ortholog(s) have role in protein import into mitochondrial matrix and TIM23 mitochondrial import inner membrane translocase complex, plasma membrane localization	35	5.29148	2.1978	3.42145	61	11.8237	2.72299	9.66616	yes
Afu2g09830	Afu2g09830	Ortholog(s) have GTPase activator activity and role in COPI coating of Golgi vesicle, ER to Golgi vesicle-mediated transport, retrograde vesicle-mediated transport, Golgi to ER	35	5.29148	2.1978	3.42145	61	11.8237	2.72299	9.66616	yes
Afu2g09910	faa4	Putative long chain fatty acid CoA ligase; fatty acid activator; hypoxia repressed protein	44	8.11523	2.54237	5.94679	65	12.4256	2.71605	10.2326	yes
Afu2g09930	Afu2g09930	Ortholog(s) have S-adenosylmethionine-dependent methyltransferase activity and role in protein methylation	44	8.11523	2.54237	5.94679	65	12.4256	2.71605	10.2326	no
Afu2g10170	Afu2g10170	Protein of unknown function identified by mass spectrometry	45	7.94727	2.4838	5.79378	61	7.25216	2.07914	5.4084	no
Afu2g10180	Afu2g10180	Ortholog of Aspergillus fumigatus A1163 : AFUB_025990	42	6.81891	2.3446	4.77598	61	7.25216	2.07914	5.4084	no
Afu2g10240	Afu2g10240	Has domain(s) with predicted oxidoreductase activity and role in oxidation-reduction process	41	7.23845	2.45327	5.15286	61	11.4944	2.67472	9.35682	no
Afu2g10550	Afu2g10550	Protein of unknown function; calcium induced	81	10.4959	2.22102	8.12753	102	11.2175	2.08586	9.09708	no
Afu2g10620	Afu2g10620	Ortholog(s) have protein serine/threonine kinase activity, protein serine/threonine kinase inhibitor activity	81	10.4959	2.22102	8.12753	94	23.995	3.43456	21.2503	no
Afu2g10660	mpdA	Putative mannitol-1-phosphate dehydrogenase; conidia-enriched protein; protein induced by heat shock; reacts with rabbit immunosera exposed to conidia; no human homolog	61	10.3537	2.51012	7.9961	61	8.44909	2.24313	6.5139	no
Afu2g10670	Afu2g10670	Has domain(s) with predicted plasma membrane localization	61	14.7972	3.17623	12.116	73	14.8582	2.85935	12.5326	no
Afu2g10920	Afu2g10920	Putative enoyl-CoA hydratase/isomerase family protein with a predicted role in beta oxidation of fatty acids; transcript up-regulated in conidia exposed to neutrophils	47	10.0575	2.82021	7.72402	78	19.5617	3.33615	17.0096	no
Afu2g11450	Afu2g11450	Has domain(s) with predicted methyltransferase activity and nucleolus localization	88	31.4408	4.57348	27.7102	89	25.4538	3.74688	22.6559	yes
Afu2g11520	Afu2g11520	Monosugar-transporter similar to mstC	127	34.0701	3.64672	30.2192	97	12.6315	2.25495	10.4284	yes
Afu2g11530	Afu2g11530	Ortholog of Aspergillus fumigatus A1163 : AFUB_027280	127	34.0701	3.64672	30.2192	97	12.6315	2.25495	10.4284	no
Afu2g11770	Afu2g11770	Ortholog of A. nidulans FGSC A4 : AN6196, A. niger CBS 513.88 : An02g03790, A. oryzae RIB40 : AO090026000469, Aspergillus wentii : Aspwe1_0031226 and Aspergillus sydowii : Aspsy1_0045308	93	13.8719	2.41521	11.2561	153	32.5597	3.0961	29.484	no
Afu2g11900	Afu2g11900	Putative pyruvate dehydrogenase kinase; transcript induced in conidia exposed to neutrophils and by exposure to human airway epithelial cells	52	10.0017	2.66332	7.67245	48	5.05185	1.91856	3.41949	no
Afu2g12140	Afu2g12140	Has domain(s) with predicted ion channel activity, voltage-gated chloride channel activity, role in chloride transport, transmembrane transport and membrane localization	48	10.6199	2.89256	8.242	56	8.36497	2.31519	6.4353	yes
Afu2g12710	Afu2g12710	Has domain(s) with predicted role in transmembrane transport and integral component of membrane localization	41	8.29463	2.6688	6.10856	62	12.2887	2.76691	10.1037	no
Afu2g13100	Afu2g13100	Ortholog of A. nidulans FGSC A4 : AN6247, A. niger CBS 513.88 : An02g01810, A. oryzae RIB40 : AO090026000266, Aspergillus wentii : Aspwe1_0663686 and Aspergillus sydowii : Aspsy1_0058211	55	8.46497	2.34899	6.26535	83	16.8945	2.89057	14.4663	no
Afu2g13110	cycA	Cytochrome c; transcript derepressed during iron starvation in hapX mutant; SrbA-regulated during hypoxia; loss of cycA results in increased levels of AoxA activity, delayed germination and reduced growth in normoxia and hypoxia	45	5.14014	1.97595	3.28909	72	11.4919	2.45957	9.35458	no
Afu2g13140	ime2	Protein with homology to Ime2p, a serine/threonine protein kinase involved in activation of meiosis of S. cerevisiae; stuA-dependent up-regulation in developmentally competent hyphae	87	11.7217	2.27743	9.25897	95	9.60272	2	7.58435	no
Afu2g13170	Afu2g13170	Ortholog of A. nidulans FGSC A4 : AN6240, A. niger CBS 513.88 : An02g01880, A. oryzae RIB40 : AO090026000277, Aspergillus wentii : Aspwe1_0665311 and Aspergillus sydowii : Aspsy1_0992503	52	10.6763	2.77778	8.29414	64	10.1934	2.43082	8.1364	yes
Afu2g13280	Afu2g13280	Ortholog of Aspergillus wentii : Aspwe1_0044577 and Aspergillus fumigatus A1163 : AFUB_028920	49	5.86286	2.03915	3.92224	60	11.2622	2.66376	9.13934	no
Afu2g13430	csmB	Putative chitin synthase; highly expressed in biofilm	80	18.5271	3.15175	15.5902	106	21.5301	2.93795	18.8883	no
Afu2g13440	chsE	Putative class V chitin synthase; required for normal hyphal growth, conidiation and normal conidiophore development; mutants have decreased chitin content	80	18.5271	3.15175	15.5902	106	21.5301	2.93795	18.8883	no
Afu2g13750	Afu2g13750	Ortholog(s) have role in protein targeting to vacuole, vacuole organization	69	19.9256	3.68809	16.8938	153	60.5451	5.29574	56.4984	no
Afu2g13840	Afu2g13840	Ortholog of Aspergillus fumigatus A1163 : AFUB_029470	120	24.5617	2.9759	21.2131	151	31.0656	3.02307	28.0494	no
Afu2g13890	anxc3.2	Putative annexin; calcium induced	120	24.5617	2.9759	21.2131	81	18.0448	3.06886	15.5628	no
Afu2g14655	Afu2g14655	Protein of unknown function	65	16.511	3.30993	13.708	80	17.1299	2.98233	14.6906	no
Afu2g14800	Afu2g14800	Has domain(s) with predicted protein dimerization activity	56	11.5217	2.80512	9.07447	82	11.6512	2.33146	9.5047	no
Afu2g14990	Afu2g14990	Tubulin alpha-2 subunit; gene pair with AFUA_1G02550 (tubulin alpha-1 subunit)	40	6.60044	2.35092	4.579	61	10.0171	2.46227	7.9732	no
Afu2g15090	Afu2g15090	Has domain(s) with predicted arsenite transmembrane transporter activity, role in arsenite transport and integral component of membrane localization	55	14.2718	3.30189	11.6283	127	45.3915	4.71281	41.8601	no
Afu2g15120	Afu2g15120	Ortholog of Aspergillus fumigatus A1163 : AFUB_030780	41	8.29463	2.6688	6.10856	90	23.4551	3.47859	20.7319	no
Afu2g15130	Afu2g15130	Ortholog(s) have ATP binding, corticosterone binding, estradiol binding, fluconazole transmembrane transporter activity, phospholipid-translocating ATPase activity	41	8.29463	2.6688	6.10856	60	11.3656	2.67907	9.23526	no
Afu2g15165	Afu2g15165	Ortholog of Aspergillus fumigatus A1163 : AFUB_030830	64	11.2968	2.58141	8.86545	134	32.4273	3.375	29.3574	no
Afu2g15170	Afu2g15170	Ortholog of A. nidulans FGSC A4 : AN7583, A. niger CBS 513.88 : An09g03380, Aspergillus wentii : Aspwe1_0117969, Aspergillus sydowii : Aspsy1_0152812 and Aspergillus terreus NIH2624 : ATET_07870	66	8.29841	2.15157	6.11208	92	10.0014	2.06117	7.9586	no
Afu2g15180	Afu2g15180	Ortholog of A. nidulans FGSC A4 : AN7587, A. niger CBS 513.88 : An09g03440, A. oryzae RIB40 : AO090012000301, Aspergillus wentii : Aspwe1_0054076 and Aspergillus sydowii : Aspsy1_0058595	66	8.29841	2.15157	6.11208	92	10.0014	2.06117	7.9586	no
Afu2g15840	Afu2g15840	Ortholog of A. nidulans FGSC A4 : AN9067/tinC, AN2167/hetC, A. fumigatus Af293 : Afu7g02570, A. niger CBS 513.88 : An15g06140 and A. oryzae RIB40 : AO090038000633, AO090012000230	52	11.3617	2.89617	8.92648	67	11.4223	2.53921	9.28892	no
Afu2g15860	Afu2g15860	Ortholog of A. nidulans FGSC A4 : AN2165/llmA, A. niger CBS 513.88 : An15g06160, A. oryzae RIB40 : AO090012000226, Aspergillus wentii : Aspwe1_0050672 and Aspergillus sydowii : Aspsy1_0054382	54	11.6601	2.88562	9.20231	67	11.4223	2.53921	9.28892	no
Afu2g15890	Afu2g15890	Has domain(s) with predicted zinc ion binding activity	49	10.2727	2.79642	7.92105	58	9.51264	2.44813	7.50175	no
Afu2g16150	Afu2g16150	Has domain(s) with predicted nucleus localization	40	5.90672	2.21143	3.96185	69	13.6084	2.78662	11.3521	no
Afu2g16230	Afu2g16230	Has domain(s) with predicted DNA binding, nucleic acid binding, zinc ion binding activity, role in transcription, DNA-templated and nucleus localization	76	9.35276	2.15445	7.07728	121	18.3276	2.47565	15.8332	no
Afu2g16430	Afu2g16430	Ortholog of Aspergillus fumigatus A1163 : AFUB_032100 and Aspergillus terreus NIH2624 : ATET_02294	43	7.97488	2.54335	5.81883	67	14.2443	2.92096	11.9527	no
Afu2g16462	Afu2g16462	Ortholog(s) have RNA polymerase III general transcription initiation factor activity, chromatin insulator sequence binding activity and role in transcription initiation from RNA polymerase III promoter	43	7.97488	2.54335	5.81883	67	14.2443	2.92096	11.9527	no
Afu2g16480	Afu2g16480	Has domain(s) with predicted zinc ion binding activity	43	7.97488	2.54335	5.81883	74	11.4368	2.42092	9.30264	no
Afu2g16490	Afu2g16490	Ortholog(s) have role in filamentous growth of a population of unicellular organisms, negative regulation of filamentous growth of a population of unicellular organisms	35	4.95348	2.12264	3.12457	111	29.1404	3.5533	26.2036	no
Afu2g16500	Afu2g16500	Ortholog of A. nidulans FGSC A4 : AN7336, A. niger CBS 513.88 : An15g06925, Aspergillus wentii : Aspwe1_0026944, Aspergillus sydowii : Aspsy1_0054451 and Aspergillus terreus NIH2624 : ATET_02290	45	10.008	2.8786	7.67819	61	7.14026	2.06391	5.3088	yes
Afu2g16560	Afu2g16560	Ortholog of A. nidulans FGSC A4 : AN10483, AN2809, AN2115, AN0033, AN12460, A. fumigatus Af293 : Afu2g00940, Afu3g15340, Afu7g00460, Afu7g06360 and A. niger CBS 513.88 : An14g02830, An16g00830	32	4.35307	2.05224	2.61441	82	15.499	2.75199	13.1393	yes
Afu2g16860	Afu2g16860	Putative major facilitator superfamily (MFS) multidrug transporter; transcript downregulated in response to voriconazole	49	10.1524	2.77469	7.81175	69	13.3275	2.74941	11.0851	no
Afu2g17170	Afu2g17170	Ortholog(s) have potassium:proton antiporter activity, sodium:proton antiporter activity	44	8.95139	2.70433	6.71012	89	23.1669	3.47222	20.4554	no
Afu2g17475	Afu2g17475	Ortholog of A. nidulans FGSC A4 : AN5367, A. oryzae RIB40 : AO090138000095, Neosartorya fischeri NRRL 181 : NFIA_092880, Aspergillus wentii : Aspwe1_0032360 and Aspergillus clavatus NRRL 1 : ACLA_076380	83	31.1465	4.77273	27.4302	152	61.2211	5.39492	57.1501	no
Afu2g17480	Afu2g17480	Ortholog of A. nidulans FGSC A4 : AN2821, A. fumigatus Af293 : Afu2g00180, A. niger CBS 513.88 : An03g05360, An04g09420 and A. oryzae RIB40 : AO090102000063, AO090009000716	83	31.1465	4.77273	27.4302	152	61.2211	5.39492	57.1501	no
Afu3g00330	Afu3g00330	Has domain(s) with predicted NAD binding, catalytic activity, coenzyme binding, oxidoreductase activity, acting on the aldehyde or oxo group of donors, NAD or NADP as acceptor activity	69	21.9628	4.00916	18.7896	129	45.293	4.63623	41.765	yes
Afu3g00810	hyd1	Putative cholestenol delta-isomerase; transcript up-regulated in conidia exposed to neutrophils; SrbA-regulated during hypoxia	57	16.8791	3.68548	14.0506	84	22.8657	3.58046	20.167	no
Afu3g00840	Afu3g00840	FAD-dependant oxygenase; secreted protein; ortholog of A. nidulans AN10930, afoF, AN5258, AN7274, AN7269 and AN1310; transcript up-regulated in conidia exposed to neutrophils	58	15.9139	3.47059	13.1525	114	38.0502	4.37928	34.7671	no
Afu3g00870	Afu3g00870	Has domain(s) with predicted N-acetyltransferase activity	117	43.596	4.88411	39.2615	183	66.6074	4.90405	62.3666	yes
Afu3g00900	amyA	Putative alpha-amylase; transcript up-regulated in conidia exposed to neutrophils; transcript induced by exposure to human airway epithelial cells; preferentially expressed at neutral pH	95	19.1567	2.90206	16.1791	165	38.2011	3.3002	34.912	no
Afu3g00910	ags1	Putative alpha(1-3) glucan synthase; predicted gene pair with AFUA_2G11270 (ags2)	95	19.1567	2.90206	16.1791	165	38.2011	3.3002	34.912	yes
Afu3g01420	Afu3g01420	Ortholog of A. nidulans FGSC A4 : AN11117, A. niger CBS 513.88 : An12g07770, A. oryzae RIB40 : AO090120000171, Aspergillus wentii : Aspwe1_0148352, Aspwe1_0165444 and Aspergillus sydowii : Aspsy1_0092105	74	25.4237	4.33025	22.0132	43	3.91382	1.78138	2.41835	no
Afu3g01430	Afu3g01430	Ortholog(s) have role in lipid droplet disassembly	74	25.4237	4.33025	22.0132	43	3.91382	1.78138	2.41835	no
Afu3g01580	Afu3g01580	Putative glucose-methanol-choline (GMC) oxidoreductase; protein induced by hydrogen peroxide; hypoxia induced protein; repressed by gliotoxin exposure	81	17.9683	3.0597	15.0699	100	20.4632	2.94118	17.8702	no
Afu3g01900	Afu3g01900	Has domain(s) with predicted role in lipid metabolic process	65	19.6103	3.80184	16.6017	77	17.3521	3.08057	14.9022	no
Afu3g02500	Afu3g02500	Putative protein kinase	48	11.7816	3.1136	9.31341	50	7.1834	2.23988	5.345	no
Afu3g02520	Afu3g02520	Has domain(s) with predicted role in transmembrane transport and integral component of membrane localization	48	11.7816	3.1136	9.31341	50	7.1834	2.23988	5.345	no
Afu3g03030	Afu3g03030	Has domain(s) with predicted catalytic activity, catechol 1,2-dioxygenase activity, ferric iron binding, iron ion binding and oxidoreductase activity, more	56	16.2816	3.62194	13.4941	79	21.1465	3.51354	18.5214	no
Afu3g03230	Afu3g03230	Has domain(s) with predicted DNA-binding transcription factor activity, sequence-specific DNA binding activity and role in regulation of transcription, DNA-templated	65	21.913	4.19382	18.7428	101	33.6944	4.33673	30.5741	no
Afu3g03320	Afu3g03320	Has domain(s) with predicted role in transmembrane transport and integral component of membrane localization	64	21.2601	4.13028	18.1341	83	22.7677	3.59897	20.073	no
Afu3g03390	sidJ	Predicted siderophore biosynthesis lipase/esterase involved in siderophore hydrolysis	123	38.6074	4.16107	34.5333	152	38.4087	3.5124	35.1113	no
Afu3g03400	sidF	Hydroxyornithine transacylase; involved in extracellular siderophore biosynthesis; essential for triacetylfusarinine C biosynthesis; SrbA-regulated during hypoxia	87	20.7891	3.24723	17.6957	131	32.3752	3.42501	29.3069	yes
Afu3g03430	sitT	Putative ABC multidrug transporter; biofilm growth regulated protein	108	38.3438	4.62649	34.2865	149	53.1919	4.75587	49.4181	no
Afu3g03550	Afu3g03550	Ortholog of Aspergillus fumigatus A1163 : AFUB_044680	108	38.3438	4.62649	34.2865	128	42.1082	4.35517	38.6782	no
Afu3g03610	Afu3g03610	Has domain(s) with predicted cellulase activity, hydrolase activity, hydrolyzing O-glycosyl compounds activity and role in polysaccharide catabolic process	99	33.5493	4.39367	29.7223	136	36.6498	3.67489	33.4175	no
Afu3g03620	Afu3g03620	Ortholog of A. nidulans FGSC A4 : AN8444/celA, A. fumigatus Af293 : Afu8g00680, A. niger CBS 513.88 : An03g05740, A. oryzae RIB40 : AO090138000033, AO090701000186 and Aspergillus wentii : Aspwe1_0040565	99	33.5493	4.39367	29.7223	136	36.6498	3.67489	33.4175	no
Afu3g03640	mirB	Putative siderophore iron transporter; SrbA-regulated during hypoxia	41	4.213	1.86335	2.49219	100	13.8906	2.3358	11.6185	no
Afu3g03650	sidG	Putative acetyltransferase with a predicted role in iron metabolism; located in an iron-regulated gene cluster; fusarinine C acetyltransferase; SrbA-regulated during hypoxia	52	8.70884	2.44917	6.48787	113	20.0086	2.70142	17.4369	no
Afu3g03720	Afu3g03720	Protein of unknown function; calcium induced	150	87.1595	8.48315	81.7808	233	122.69	7.63209	116.176	no
Afu3g04010	Afu3g04010	Has domain(s) with predicted role in transmembrane transport and integral component of membrane localization	41	7.94051	2.5958	5.78767	58	10.4701	2.59123	8.395	no
Afu3g04040	Afu3g04040	Has domain(s) with predicted DNA binding, DNA-binding transcription factor activity, RNA polymerase II-specific, zinc ion binding activity and role in regulation of transcription, DNA-templated, transcription, DNA-templated	48	9.74676	2.73133	7.43802	65	11.2447	2.55418	9.12275	no
Afu3g04070	hacA	bZIP transcription factor, major regulator of the unfolded protein response (UPR)	46	10.7396	2.98651	8.35082	113	41.1296	4.75793	37.7301	no
Afu3g05350	htb1	Histone H2B	45	4.32265	1.83121	2.58791	80	11.1281	2.30114	9.01273	no
Afu3g05730	Afu3g05730	Nicotinate mononucleotide pyrophosphorylase; no human homolog	111	27.7574	3.42089	24.215	153	41.2048	3.69659	37.8035	no
Afu3g05760	Afu3g05760	C6 transcription factor; ortholog of A. nidulans AN3433; calcium downregulated	82	15.3861	2.73927	12.6624	125	29.8279	3.32629	26.8648	no
Afu3g06030	Afu3g06030	Ortholog(s) have proteasome binding, protein binding, bridging, ubiquitin binding, ubiquitin conjugating enzyme activity	41	4.98506	2.01149	3.15256	124	40.7346	4.34028	37.3481	no
Afu3g06050	Afu3g06050	Ortholog(s) have role in filamentous growth of a population of unicellular organisms in response to biotic stimulus and growth of unicellular organism as a thread of attached cells, more	52	12.5291	3.10304	10.0054	89	24.4608	3.62611	21.6981	no
Afu3g06250	Afu3g06250	Has domain(s) with predicted transcription coregulator activity, role in regulation of transcription by RNA polymerase II and mediator complex localization	56	11.3346	2.77507	8.90082	60	7.33255	2.10345	5.48319	no
Afu3g06800	Afu3g06800	Ortholog of A. nidulans FGSC A4 : AN4791, A. niger CBS 513.88 : An11g09530, A. oryzae RIB40 : AO090020000317, Aspergillus sydowii : Aspsy1_0816069 and Aspergillus terreus NIH2624 : ATET_08741	53	10.4781	2.7163	8.111	96	22.594	3.23549	19.9067	no
Afu3g06810	Afu3g06810	Predicted DDE1 transposon-related ORF	53	10.4781	2.7163	8.111	96	22.594	3.23549	19.9067	no
Afu3g07590	Afu3g07590	Ortholog(s) have role in Golgi organization and Golgi apparatus localization	40	7.31428	2.49695	5.22153	85	20.4923	3.26252	17.898	no
Afu3g07600	Afu3g07600	Ortholog of A. nidulans FGSC A4 : AN12479, A. oryzae RIB40 : AO090020000133, Neosartorya fischeri NRRL 181 : NFIA_069570 and Aspergillus versicolor : Aspve1_0573130	40	7.31428	2.49695	5.22153	85	20.4923	3.26252	17.898	no
Afu3g07730	Afu3g07730	Protein of unknown function; transcript repressed by exposure to human airway epithelial cells	51	11.3044	2.91807	8.87257	87	21.7672	3.36134	19.115	no
Afu3g07860	Afu3g07860	Has domain(s) with predicted role in biosynthetic process	50	8.73803	2.5	6.51489	137	39.7957	3.91378	36.4437	no
Afu3g07900	Afu3g07900	Ortholog of A. nidulans FGSC A4 : AN8368, AN2952, A. fumigatus Af293 : Afu4g14080, Afu8g00900, A. niger CBS 513.88 : An02g11330, An03g05560 and A. oryzae RIB40 : AO090120000471	57	8.24659	2.27987	6.06722	99	11.8848	2.1692	9.72377	no
Afu3g08460	Afu3g08460	60S ribosomal protein L35Ae	76	12.9227	2.56325	10.37	102	17.1118	2.59839	14.6731	no
Afu3g08500	Afu3g08500	Ortholog of A. nidulans FGSC A4 : AN2983/msb1, A. niger CBS 513.88 : An02g12170, A. oryzae RIB40 : AO090005001425, Aspergillus wentii : Aspwe1_0052317 and Aspergillus sydowii : Aspsy1_0146126	41	7.36789	2.47934	5.2702	91	22.9345	3.39233	20.2326	no
Afu3g09220	Afu3g09220	Putative P450 family fatty acid hydroxylase with a possible role in the hydroxylation of a very long-chain fatty acid	43	8.7648	2.69939	6.53762	61	10.8794	2.58549	8.78007	no
Afu3g09660	Afu3g09660	Ortholog of Aspergillus fumigatus A1163 : AFUB_039510	97	26.661	3.65127	23.1736	86	15.5998	2.69183	13.2349	no
Afu3g09690	Afu3g09690	Laminin-binding protein with extracellular thaumatin domain; predicted adhesin-like protein; expression induced in biofilm; repressed by exposure to artemisinin	85	26.3324	3.99628	22.8668	48	5.2065	1.94444	3.55471	no
Afu3g09700	Afu3g09700	Has domain(s) with predicted zinc ion binding activity, role in ER to Golgi vesicle-mediated transport, intracellular protein transport and COPII vesicle coat localization	85	26.3324	3.99628	22.8668	48	5.2065	1.94444	3.55471	no
Afu3g09760	Afu3g09760	Ortholog(s) have mitochondrial inner membrane, mitochondrial large ribosomal subunit localization	62	16.8639	3.47299	14.0373	61	9.27197	2.35741	7.27658	no
Afu3g09960	aurA	Putative aureobasidin resistance protein; required for inositol phosphorylceramide (IPC) synthase activity	56	8.47836	2.33224	6.27761	130	23.2773	2.74173	20.5615	yes
Afu3g10110	Afu3g10110	Electron transfer flavoprotein-ubiquinone oxidoreductase; hypoxia repressed protein	66	13.2554	2.80805	10.6796	98	20.2205	2.95346	17.6384	yes
Afu3g10120	Afu3g10120	Putative TATA box binding protein; calcium induced	66	13.2554	2.80805	10.6796	98	20.2205	2.95346	17.6384	no
Afu3g10430	Afu3g10430	Predicted DDE1 transposon-related ORF	38	6.94531	2.47817	4.88673	63	12.7603	2.81083	10.5491	no
Afu3g10440	Afu3g10440	Ortholog of A. nidulans FGSC A4 : AN4944, Aspergillus flavus NRRL 3357 : AFL2T_02410, Aspergillus wentii : Aspwe1_0025030 and Aspergillus versicolor : Aspve1_0884593	38	6.94531	2.47817	4.88673	63	12.7603	2.81083	10.5491	no
Afu3g10930	Afu3g10930	Ortholog(s) have double-stranded DNA binding, sequence-specific DNA binding activity	70	10.653	2.38896	8.27235	80	10.4482	2.22772	8.37604	no
Afu3g10940	pex19	Ortholog of A. nidulans FGSC A4 : AN4899, A. oryzae RIB40 : AO090003000644, Aspergillus wentii : Aspwe1_0362912, Aspergillus sydowii : Aspsy1_0793863 and Aspergillus terreus NIH2624 : ATET_04619	70	10.653	2.38896	8.27235	80	10.4482	2.22772	8.37604	no
Afu3g11330	atfA	bZIP-type transcription factor; A. nidulans ortholog atfA has role in response to oxidative stress, response to heat	49	7.10776	2.24618	5.03444	81	15.8582	2.81207	13.4804	no
Afu3g11590	atg11	Predicted autophagy protein with a predicted role in trafficking of autophagosomes and cytoplasm to vacuole; transcript strongly induced by growth in hypoxia	58	10.9552	2.66486	8.55072	74	11.5698	2.43665	9.42798	no
Afu3g11790	Afu3g11790	Has domain(s) with predicted transmembrane transporter activity, role in transmembrane transport and integral component of membrane, membrane localization	53	11.0509	2.8125	8.63881	105	30.791	3.8771	27.7877	no
Afu3g12020	Afu3g12020	Ortholog of A. nidulans FGSC A4 : AN0227, A. fumigatus Af293 : Afu5g10910, Afu4g06275, A. niger CBS 513.88 : An14g03700, An04g00590, An02g07840 and A. oryzae RIB40 : AO090010000440, AO090023000963	51	11.4526	2.94451	9.01127	94	26.5812	3.72841	23.7431	no
Afu3g12080	Afu3g12080	Ortholog(s) have enzyme regulator activity, mRNA binding activity	55	13.9246	3.24074	11.3053	94	26.5812	3.72841	23.7431	no
Afu3g12100	Afu3g12100	Putative trehalase phosphorylase with a predicted role in the glucose-1-phosphate pathway	55	13.9246	3.24074	11.3053	94	26.5812	3.72841	23.7431	no
Afu3g12160	Afu3g12160	Has domain(s) with predicted DNA binding, DNA-binding transcription factor activity, sequence-specific DNA binding activity and role in regulation of transcription, DNA-templated	47	10.8642	2.97398	8.46581	41	4.11521	1.84461	2.59011	no
Afu3g12190	Afu3g12190	Has domain(s) with predicted zinc ion binding activity	53	11.403	2.87234	8.9653	69	15.5417	3.04878	13.1798	no
Afu3g12290	dim1	Ortholog(s) have role in mRNA splicing, via spliceosome, regulation of DNA methylation and U4/U6 x U5 tri-snRNP complex, U5 snRNP localization	37	4.37696	1.95876	2.63502	95	24.6214	3.47826	21.8533	no
Afu3g12295	Afu3g12295	NA	37	4.37696	1.95876	2.63502	95	24.6214	3.47826	21.8533	no
Afu3g12300	Afu3g12300	60S ribosomal protein L22	37	4.37696	1.95876	2.63502	95	24.6214	3.47826	21.8533	no
Afu3g12330	Afu3g12330	Putative phosphatidyl synthase; transcript induced by exposure to human airway epithelial cells	44	7.62072	2.44831	5.49756	96	22.7794	3.25503	20.0842	no
Afu3g12350	Afu3g12350	Ortholog(s) have phosphatidic acid binding, phosphatidylinositol-3,5-bisphosphate binding, phosphatidylinositol-3-phosphate binding, sphingolipid binding activity	48	8.57312	2.52058	6.36378	75	12.4959	2.52996	10.2994	no
Afu3g13180	Afu3g13180	Ortholog of A. niger CBS 513.88 : An02g09040, A. oryzae RIB40 : AO090012000814, Neosartorya fischeri NRRL 181 : NFIA_064160 and Aspergillus wentii : Aspwe1_0170078	50	8.01946	2.37873	5.85935	78	12.2643	2.45494	10.0823	yes
Afu3g13210	Afu3g13210	Has domain(s) with predicted ATP binding, protein kinase activity, protein tyrosine kinase activity and role in protein phosphorylation	41	6.23078	2.25322	4.24896	66	11.7542	2.60295	9.60231	yes
Afu3g13230	Afu3g13230	Has domain(s) with predicted DNA binding activity	39	7.21748	2.50627	5.13368	65	13.5719	2.87707	11.3177	no
Afu3g13440	Afu3g13440	Stomatin family protein; hypoxia induced protein	48	7.29793	2.29831	5.20663	89	17.4172	2.83197	14.9642	no
Afu3g13560	Afu3g13560	Ortholog of Aspergillus fumigatus A1163 : AFUB_035640	47	10.4526	2.89505	8.08777	52	7.02776	2.17928	5.20419	no
Afu3g13850	Afu3g13850	Ortholog(s) have role in protein de-ADP-ribosylation	60	14.1296	3.10275	11.4962	131	42.7048	4.32503	39.2579	no
Afu3g13940	Afu3g13940	Ortholog of A. nidulans FGSC A4 : AN3479, AN8495, AN3143, A. fumigatus Af293 : Afu3g01440, Afu4g03340, Afu5g07620 and A. niger CBS 513.88 : An13g02880, An09g04780	47	9.05725	2.63447	6.80616	78	15.9901	2.88954	13.6059	no
Afu3g14070	Afu3g14070	Ortholog of Aspergillus glaucus : Aspgl1_0029312, Aspergillus wentii : Aspwe1_0181493 and Aspergillus fumigatus A1163 : AFUB_035149	55	8.18657	2.30643	6.01191	83	10.4813	2.19665	8.40557	yes
Afu3g14090	Afu3g14090	Ortholog of A. nidulans FGSC A4 : AN2498, A. oryzae RIB40 : AO090012000646, Aspergillus wentii : Aspwe1_0407854, Aspergillus sydowii : Aspsy1_0148141 and Aspergillus terreus NIH2624 : ATET_04020	55	8.18657	2.30643	6.01191	83	10.4813	2.19665	8.40557	yes
Afu3g14140	casB	Predicted metacaspase, an aspartate-specific cysteine protease involved in apoptosis; mutants show growth defects under conditions of ER stress	55	12.684	3.02703	10.1486	121	30.5552	3.46591	27.5605	yes
Afu3g14410	Afu3g14410	Ortholog of A. nidulans FGSC A4 : AN2522, A. niger CBS 513.88 : An09g04050, A. oryzae RIB40 : AO090701000592, Aspergillus wentii : Aspwe1_0073746 and Aspergillus sydowii : Aspsy1_0146188	61	12.7613	2.86242	10.221	99	15.1975	2.46427	12.8546	no
Afu3g14540	hsp30	Putative 30-kilodalton heat shock protein; conidia-enriched protein; protein levels increase in response to amphotericin B and hydrogen peroxide	48	10.4929	2.86885	8.12465	50	6.03044	2.05149	4.29611	no
Afu3g15330	Afu3g15330	Protein of unknown function identified by mass spectrometry	43	9.24425	2.79588	6.97672	58	10.4701	2.59123	8.395	no
Afu4g01270	Afu4g01270	Ortholog of A. nidulans FGSC A4 : AN3285, Neosartorya fischeri NRRL 181 : NFIA_044020, Aspergillus versicolor : Aspve1_0066429 and Aspergillus fumigatus A1163 : AFUB_101760	33	4.91261	2.16046	3.08806	61	11.8237	2.72299	9.66616	no
Afu4g02790	Afu4g02790	Has domain(s) with predicted hydrolase activity, acting on carbon-nitrogen (but not peptide) bonds activity and role in nitrogen compound metabolic process	260	8.53665	1.4612	6.33051	69	15.7259	3.07434	13.3537	yes
Afu4g03010	Afu4g03010	Protein of unknown function; calcium downregulated	45	6.41288	2.20307	4.41318	52	7.02776	2.17928	5.20419	no
Afu4g03150	Afu4g03150	Ortholog(s) have O6-alkylguanine-DNA binding activity and role in DNA dealkylation involved in DNA repair	55	14.561	3.35329	11.8965	87	24.7699	3.72566	21.9965	no
Afu4g03170	Afu4g03170	Ortholog of A. nidulans FGSC A4 : AN7183, A. niger CBS 513.88 : An14g02200, A. oryzae RIB40 : AO090011000108, Aspergillus wentii : Aspwe1_0097292 and Aspergillus sydowii : Aspsy1_0157838	55	14.561	3.35329	11.8965	87	24.7699	3.72566	21.9965	no
Afu4g03320	Afu4g03320	Putative cation exchanger; calcium induced	51	10.2883	2.73973	7.93528	88	10.3813	2.13429	8.31307	no
Afu4g03325	Afu4g03325	Ortholog of Aspergillus fumigatus A1163 : AFUB_099730	50	8.78135	2.50737	6.55283	92	14.7537	2.51351	12.4334	no
Afu4g03480	Afu4g03480	Ortholog of Aspergillus fumigatus A1163 : AFUB_099570	40	6.99743	2.43179	4.93411	81	19.0911	3.19564	16.5614	no
Afu4g04070	Afu4g04070	Protein of unknown function, phoB-regulated	44	6.54616	2.24775	4.52962	74	11.3972	2.41624	9.26538	no
Afu4g04280	Afu4g04280	Ortholog(s) have proteasome binding activity and role in cellular response to arsenic-containing substance, proteasome-mediated ubiquitin-dependent protein catabolic process	40	6.88563	2.40893	4.8365	59	10.586	2.58621	8.50421	no
Afu4g04310	Afu4g04310	Ortholog(s) have cell cortex of cell tip, cell division site localization	55	15.3496	3.49563	12.6282	84	20.3759	3.27427	17.7867	no
Afu4g04318	Afu4g04318	Ortholog(s) have role in cellular copper ion homeostasis and yeast-form cell wall localization	55	15.3496	3.49563	12.6282	84	20.3759	3.27427	17.7867	no
Afu4g05930	Afu4g05930	Ortholog of A. nidulans FGSC A4 : AN4302, A. niger CBS 513.88 : An03g02750, Aspergillus wentii : Aspwe1_0099945, Aspergillus sydowii : Aspsy1_0036582 and Aspergillus terreus NIH2624 : ATET_06827	50	9.98627	2.71566	7.6582	65	10.4692	2.44989	8.395	no
Afu4g05940	Afu4g05940	Has domain(s) with predicted catalytic activity and role in biosynthetic process	50	9.98627	2.71566	7.6582	65	10.4692	2.44989	8.395	no
Afu4g06040	Afu4g06040	Ortholog of A. nidulans FGSC A4 : AN4312, A. niger CBS 513.88 : An04g00270, A. oryzae RIB40 : AO090023000991, Aspergillus wentii : Aspwe1_0101375 and Aspergillus sydowii : Aspsy1_0036593	54	12.8743	3.09336	10.3247	94	24.4475	3.48496	21.6852	no
Afu4g06430	Afu4g06430	Ortholog of Aspergillus fumigatus A1163 : AFUB_063549	38	6.77012	2.44055	4.73217	61	11.8237	2.72299	9.66616	no
Afu4g06450	Afu4g06450	Predicted DDE1 transposon-related ORF	38	6.77012	2.44055	4.73217	61	11.8237	2.72299	9.66616	no
Afu4g06480	Afu4g06480	Has domain(s) with predicted role in intracellular signal transduction	36	4.41568	1.98498	2.66784	93	24.6907	3.53916	21.9201	no
Afu4g06660	Afu4g06660	Ortholog of Aspergillus fumigatus A1163 : AFUB_063740	63	8.87161	2.2695	6.63644	110	13.914	2.23971	11.6407	no
Afu4g06670	aspf7	Allergen Asp f 7; transcript induced by voriconazole and by by growth on hydrogen peroxide	96	24.1465	3.40112	20.8282	181	47.3977	3.64291	43.8011	no
Afu4g06730	Afu4g06730	Ortholog of A. nidulans FGSC A4 : AN4383, A. niger CBS 513.88 : An04g01110, A. oryzae RIB40 : AO090023000913, Aspergillus wentii : Aspwe1_0034688 and Aspergillus sydowii : Aspsy1_0051227	60	15.4907	3.32244	12.7599	68	12.6613	2.68274	10.4567	yes
Afu4g06770	Afu4g06770	Ortholog(s) have 2 iron, 2 sulfur cluster binding, ferrous iron binding, iron-sulfur transferase activity and role in [2Fe-2S] cluster assembly, cellular iron ion homeostasis, tRNA wobble uridine modification	57	12.488	2.93226	9.96701	68	11.4615	2.52562	9.326	no
Afu4g07010	Afu4g07010	Has domain(s) with predicted endodeoxyribonuclease activity, producing 5'-phosphomonoesters activity	46	8.42573	2.54605	6.22895	67	12.3049	2.65625	10.119	no
Afu4g07020	Afu4g07020	Has domain(s) with predicted catalytic activity, heme binding, oxidoreductase activity	46	8.42573	2.54605	6.22895	67	12.3049	2.65625	10.119	no
Afu4g07080	dspC	Ortholog(s) have protein tyrosine phosphatase activity	103	28.873	3.7276	25.2762	226	54.0597	3.42486	50.2555	no
Afu4g07300	Afu4g07300	Predicted adhesin-like protein	53	10.4127	2.70541	8.05094	67	9.79925	2.32877	7.76814	no
Afu4g07360	metH	Putative cobalamin-independent methionine synthase; protein induced by heat shock; Yap1-dependent induction in response to hydrogen peroxide; reacts with rabbit immunosera exposed to A. fumigatus conidia; no human homolog	59	11.7402	2.75989	9.27619	77	15.2547	2.822	12.9072	no
Afu4g07370	Afu4g07370	Ortholog of A. niger CBS 513.88 : An04g01760, Neosartorya fischeri NRRL 181 : NFIA_108850, Aspergillus versicolor : Aspve1_0054023 and Aspergillus sydowii : Aspsy1_0062348	59	11.7402	2.75989	9.27619	77	15.2547	2.822	12.9072	no
Afu4g07560	Afu4g07560	Has domain(s) with predicted DNA binding, chromatin binding activity	39	6.44468	2.34467	4.44154	73	16.7583	3.10663	14.337	yes
Afu4g08010	odcA	Putative ornithine decarboxylase, a key enzyme in the biosynthesis of polyamines	36	5.54352	2.22892	3.6416	70	14.6195	2.89796	12.3077	yes
Afu4g08020	Afu4g08020	Ortholog of A. nidulans FGSC A4 : AN3844, A. niger CBS 513.88 : An04g02450, A. oryzae RIB40 : AO090023001012, Neosartorya fischeri NRRL 181 : NFIA_108180 and Aspergillus wentii : Aspwe1_0034514	36	5.54352	2.22892	3.6416	70	14.6195	2.89796	12.3077	no
Afu4g08710	Afu4g08710	Putative short chain dehydrogenase; transcriptionally up-regulated in conidia exposed to neutrophils; induced by gliotoxin exposure	67	18.9922	3.62087	16.0235	80	14.2508	2.64706	11.959	no
Afu4g08890	Afu4g08890	Has domain(s) with predicted oxidoreductase activity and role in oxidation-reduction process	46	9.29116	2.70737	7.02035	63	12.717	2.80456	10.5097	no
Afu4g09060	Afu4g09060	Putative phosphatidate cytidylyltransferase	67	18.3386	3.51967	15.4135	86	21.0722	3.30547	18.4511	no
Afu4g09070	Afu4g09070	Ortholog of A. nidulans FGSC A4 : AN11885, A. niger CBS 513.88 : An04g03970, A. oryzae RIB40 : AO090023000649, Neosartorya fischeri NRRL 181 : NFIA_107100 and Aspergillus wentii : Aspwe1_0023020	67	18.3386	3.51967	15.4135	86	21.0722	3.30547	18.4511	no
Afu4g09130	Afu4g09130	Putative mannosyltransferase	54	14.317	3.34957	11.6706	71	15.7562	3.02521	13.3824	no
Afu4g09510	Afu4g09510	Ortholog of A. nidulans FGSC A4 : AN7052, A. fumigatus Af293 : Afu4g03945, A. niger CBS 513.88 : An14g00940, An07g04990, An04g08460 and A. oryzae RIB40 : AO090023000583, AO090011000324, AO090005000036	49	12.0636	3.12891	9.57517	64	12.9703	2.81629	10.748	no
Afu4g09670	Afu4g09670	Ortholog of A. nidulans FGSC A4 : AN1846, A. oryzae RIB40 : AO090003001272, Aspergillus wentii : Aspwe1_0102762, Aspergillus sydowii : Aspsy1_0026263 and Aspergillus terreus NIH2624 : ATET_00776	49	11.4642	3.01568	9.02167	121	31.5585	3.55478	28.5232	yes
Afu4g09700	Afu4g09700	Protein of unknown function; transcript induced by voriconazole	91	34.1198	4.81172	30.2677	98	24.9421	3.4375	22.1625	no
Afu4g10040	Afu4g10040	Ortholog(s) have Golgi cisterna, endosome localization	37	5.12395	2.11581	3.27478	79	16.4217	2.91971	14.0164	yes
Afu4g10110	htfA	Putative homeobox transcription factor; calcium induced	63	10.3532	2.47104	7.99571	83	9.51465	2.09685	7.5037	no
Afu4g10150	Afu4g10150	Ortholog(s) have alpha-1,4-glucosidase activity, glucosyltransferase activity, maltose alpha-glucosidase activity, starch alpha-glucosidase activity	62	16.8171	3.46535	13.9939	101	29.0777	3.80597	26.1437	no
Afu4g10160	Afu4g10160	Ortholog(s) have sequence-specific DNA binding, transcription regulatory region DNA binding activity and role in cellular carbohydrate biosynthetic process, regulation of transcription, DNA-templated, starch metabolic process	62	16.8171	3.46535	13.9939	101	29.0777	3.80597	26.1437	no
Afu4g10190	Afu4g10190	Putative oxidoreductase; calcium induced	102	34.7954	4.43201	30.9085	84	10.3341	2.17058	8.26891	no
Afu4g10200	rfeF	Putative transcription factor; calcium induced	102	34.7954	4.43201	30.9085	84	10.3341	2.17058	8.26891	no
Afu4g10270	Afu4g10270	Ortholog(s) have 3-hydroxyacyl-CoA dehydratase activity, enoyl-CoA hydratase activity and role in fatty acid elongation, sphingolipid biosynthetic process, vacuolar transport	46	6.87827	2.26615	4.8299	74	14.2185	2.75735	11.9282	no
Afu4g10330	Afu4g10330	Ortholog(s) have protein farnesyltransferase activity, role in protein farnesylation and protein farnesyltransferase complex localization	68	10.3075	2.37767	7.95313	70	6.52361	1.8893	4.74154	yes
Afu4g10340	Afu4g10340	C6 zinc-finger domain protein; transcript up-regulated in conidia exposed to neutrophils	68	10.3075	2.37767	7.95313	70	6.52361	1.8893	4.74154	no
Afu4g10390	Afu4g10390	Ortholog of S. cerevisiae : RMD8, A. nidulans FGSC A4 : AN1996, A. niger CBS 513.88 : An04g06420, A. oryzae RIB40 : AO090003001178 and Aspergillus wentii : Aspwe1_0034138	73	21.3233	3.74494	18.1933	114	31.67	3.72651	28.6302	no
Afu4g10410	Afu4g10410	Putative aspartate aminotransferase; reacts with rabbit immunosera exposed to A. fumigatus conidia; hypoxia induced protein; transcript induced in conidia exposed to neutrophils or to human airway epithelial cells	69	15.5993	3.05677	12.8612	68	8.47713	2.14819	6.54013	no
Afu4g10680	Afu4g10680	Ortholog of A. nidulans FGSC A4 : AN1975, A. niger CBS 513.88 : An04g06030, A. oryzae RIB40 : AO090003001147, Aspergillus wentii : Aspwe1_0022825 and Aspergillus sydowii : Aspsy1_0053914	43	7.67945	2.48588	5.55093	64	11.4314	2.6	9.29753	yes
Afu4g10690	isa1	Iron-sulphur cluster assembly accessory protein	43	7.67945	2.48588	5.55093	64	11.4314	2.6	9.29753	yes
Afu4g10880	Afu4g10880	Protein of unknown function; mutation causes increased azole resistance	63	17.1071	3.47448	14.2641	110	32.038	3.8676	28.9842	no
Afu4g10970	Afu4g10970	Has domain(s) with predicted Rho GTPase binding, actin binding activity and role in actin cytoskeleton organization	55	11.3705	2.80843	8.93465	59	8.31084	2.25564	6.38767	yes
Afu4g10990	Afu4g10990	Ortholog(s) have solute:proton symporter activity	55	11.3705	2.80843	8.93465	59	8.31084	2.25564	6.38767	no
Afu4g11130	Afu4g11130	Ortholog of A. nidulans FGSC A4 : AN5621, A. niger CBS 513.88 : An04g05550, Aspergillus wentii : Aspwe1_0022788, Aspergillus sydowii : Aspsy1_0088403 and Aspergillus terreus NIH2624 : ATET_03967	40	5.69519	2.16931	3.77128	84	11.759	2.31734	9.60688	no
Afu4g11140	Afu4g11140	Has domain(s) with predicted DNA-directed DNA polymerase activity, damaged DNA binding activity and role in DNA repair	40	5.69519	2.16931	3.77128	84	11.759	2.31734	9.60688	no
Afu4g11230	Afu4g11230	Ortholog of A. nidulans FGSC A4 : AN5612, A. niger CBS 513.88 : An04g05430, A. oryzae RIB40 : AO090003001098, Aspergillus wentii : Aspwe1_0022777 and Aspergillus sydowii : Aspsy1_0148394	32	4.00152	1.96897	2.31929	59	10.9143	2.63515	8.81135	no
Afu4g11270	Afu4g11270	Ortholog of A. nidulans FGSC A4 : AN9473, A. niger CBS 513.88 : An04g05360, A. oryzae RIB40 : AO090003001094, Aspergillus wentii : Aspwe1_0102365 and Aspergillus sydowii : Aspsy1_0148568	53	9.33331	2.52809	7.05957	74	12.5573	2.5545	10.3573	no
Afu4g11280	Afu4g11280	Ortholog(s) have dolichyl-phosphate-mannose-glycolipid alpha-mannosyltransferase activity, role in GPI anchor biosynthetic process and integral component of endoplasmic reticulum membrane, mannosyltransferase complex localization	53	9.33331	2.52809	7.05957	74	12.5573	2.5545	10.3573	yes
Afu4g11310	fbp1	Fructose-1,6-bisphosphatase	70	18.0129	3.36812	15.1113	75	13.639	2.66667	11.3811	no
Afu4g11480	Afu4g11480	Ortholog(s) have role in cellular potassium ion homeostasis	82	21.0395	3.41002	17.9269	117	23.958	2.97229	21.2143	no
Afu4g11540	Afu4g11540	Putative glycerol kinase; transcript up-regulated in conidia exposed to neutrophils	62	14.5542	3.10651	11.8903	58	6.66186	2.03589	4.86896	no
Afu4g11700	Afu4g11700	Ortholog of A. nidulans FGSC A4 : AN5568, A. niger CBS 513.88 : An04g04540, A. oryzae RIB40 : AO090003001049, Aspergillus wentii : Aspwe1_0033982 and Aspergillus sydowii : Aspsy1_0879955	51	8.62351	2.45747	6.41011	43	3.71509	1.74465	2.24941	no
Afu4g11710	Afu4g11710	Putative oxidoreductase, zinc-binding dehydrogenase family protein; transcript up-regulated in conidia exposed to neutrophils	68	12.4582	2.65589	9.9395	72	8.70735	2.12704	6.7543	no
Afu4g11720	Afu4g11720	Putative phosphatidyl synthase; protein levels increase in response to pkaC overexpression	60	6.36676	1.97028	4.37092	102	15.0757	2.41784	12.7391	no
Afu4g11800	alp1	Putative secreted alkaline serine protease; cleaves human complement components C3, C4, and C5; predicted signal sequence for secretion; fibrinogen-binding	57	14.6937	3.2992	12.0202	67	14.7122	2.98651	12.3939	no
Afu4g12040	erg7B	Putative oxidosqualene:lanosterol cyclase (OSLC) with a role in protostadienol biosynthesis; SrbA-regulated during hypoxia	32	4.42893	2.07026	2.67902	68	11.2493	2.49819	9.12709	no
Afu4g12050	Afu4g12050	Thermoresistant gluconokinase; predicted gene pair with AFUA_1G00530	56	12.1389	2.9052	9.64558	92	22.1661	3.28158	19.4976	no
Afu4g12160	Afu4g12160	Ortholog(s) have cyclin-dependent protein serine/threonine kinase activator activity	65	19.9047	3.85064	16.8743	122	42.4934	4.58271	39.0522	no
Afu4g12330	ydc1	Putative alkaline dihydroceramidase	54	12.578	3.04204	10.0509	78	16.4886	2.94996	14.08	yes
Afu4g12910	Afu4g12910	Ortholog(s) have thiol-dependent ubiquitin-specific protease activity and role in carbon catabolite repression of transcription, endocytosis, protein K11-linked deubiquitination, protein K48-linked deubiquitination	49	9.91622	2.73224	7.59422	69	11.9045	2.5641	9.74221	no
Afu4g13120	Afu4g13120	Putative glutamine synthetase; protein induced by heat shock and by hydrogen peroxide; transcript induced by exposure to human airway epithelial cells	83	11.6926	2.32301	9.23233	139	20.5505	2.46046	17.9532	yes
Afu4g13330	Afu4g13330	Ortholog(s) have ATP-dependent RNA helicase activity, RNA binding activity	39	5.18564	2.08768	3.32891	116	22.8958	2.89891	20.1955	no
Afu4g13510	acuD	Putative isocitrate lyase with a predicted role in the glyoxylate cycle; conidia-enriched protein; transcript up-regulated in conidia exposed to neutrophils	31	3.54963	1.88014	1.94175	61	11.2135	2.63381	9.09316	no
Afu4g13600	Afu4g13600	Has domain(s) with predicted nucleic acid binding, zinc ion binding activity	59	10.2173	2.53165	7.87182	124	23.4691	2.8319	20.7449	yes
Afu4g13610	Afu4g13610	Ortholog of Aspergillus fumigatus A1163 : AFUB_070530	49	5.54815	1.98728	3.64597	96	10.4208	2.06559	8.35047	no
Afu4g13620	Afu4g13620	Ortholog of Aspergillus fumigatus A1163 : AFUB_070540	49	5.54815	1.98728	3.64597	96	10.4208	2.06559	8.35047	no
Afu4g13630	Afu4g13630	PE repeat family protein	62	14.1045	3.03761	11.4722	66	11.3696	2.55141	9.2391	no
Afu4g14040	Afu4g14040	Ortholog of A. nidulans FGSC A4 : AN3519, AN2646, AN0587, AN0866, AN7370 and A. fumigatus Af293 : Afu1g15200, Afu3g03790, Afu5g06900, Afu7g08575	38	6.94531	2.47817	4.88673	88	24.9855	3.72074	22.204	yes
Afu4g14230	Afu4g14230	Has domain(s) with predicted role in transmembrane transport and integral component of membrane localization	100	26.6906	3.57396	23.2013	81	14.8838	2.70092	12.5571	no
Afu4g14380	Afu4g14380	Protein of unknown function; transcript downregulated in response to voriconazole	82	31.5845	4.89387	27.8465	117	45.4658	5.0994	41.9318	no
Afu4g14390	Afu4g14390	Predicted DDE1 transposon-related ORF	44	7.57855	2.44035	5.4598	67	12.0287	2.61941	9.85938	yes
Afu4g14440	Afu4g14440	Has domain(s) with predicted catalytic activity and role in metabolic process	46	9.97762	2.83816	7.65026	71	15.6807	3.01508	13.3123	no
Afu4g14800	sdr1	Putative short chain dehydrogenase with a predicted role in helvonic acid biosynthesis	31	4.18149	2.03337	2.46499	63	12.7603	2.81083	10.5491	yes
Afu4g14810	cyp5081D1	Putative cytochrome P450 monooxygenase with a predicted role in helvonic acid biosynthesis	31	4.18149	2.03337	2.46499	46	5.73152	2.0642	4.02265	no
Afu5g00100	Afu5g00100	Ortholog of A. nidulans FGSC A4 : AN9205, AN9209, A. fumigatus Af293 : Afu8g01840, Afu7g06523, A. niger CBS 513.88 : An05g01030, An13g03050, An16g01380 and A. oryzae RIB40 : AO090012000290, AO090011000069	44	9.73345	2.85943	7.42572	59	10.9143	2.63515	8.81135	no
Afu5g00840	Afu5g00840	Ortholog of A. nidulans FGSC A4 : AN5639, AN2587, AN9444, AN7395, A. niger CBS 513.88 : An03g01000, A. oryzae RIB40 : AO090102000018 and Aspergillus wentii : Aspwe1_0065350, Aspwe1_0153928, Aspwe1_0178709	55	15.6916	3.5584	12.9456	56	9.60322	2.50339	7.58435	no
Afu5g01840	Afu5g01840	Protein of unknown function; calcium induced	57	14.5196	3.26945	11.8599	126	40.5037	4.25889	37.1242	yes
Afu5g02290	Afu5g02290	Ortholog(s) have chloride transmembrane transporter activity, high-affinity potassium ion transmembrane transporter activity	86	31.2718	4.64248	27.5508	168	65.1975	5.21605	61.0042	yes
Afu5g02320	Afu5g02320	Secreted protein of unknown function	86	31.2718	4.64248	27.5508	87	17.6665	2.89664	15.2021	no
Afu5g02510	Afu5g02510	Ortholog(s) have role in Golgi to vacuole transport, ascospore wall assembly, cellular sphingolipid homeostasis, retrograde transport, endosome to Golgi and GARP complex localization	35	5.62591	2.27273	3.71458	58	10.4701	2.59123	8.395	yes
Afu5g02650	Afu5g02650	Protein of unknown function; transcript induced by voriconazole	35	5.62591	2.27273	3.71458	70	15.2912	2.98822	12.9417	no
Afu5g02655	Afu5g02655	Has domain(s) with predicted DNA-binding transcription factor activity, sequence-specific DNA binding activity and role in regulation of transcription, DNA-templated	35	5.62591	2.27273	3.71458	70	15.2912	2.98822	12.9417	no
Afu5g02785	Afu5g02785	Ortholog of Neosartorya fischeri NRRL 181 : NFIA_039310 and Aspergillus fumigatus A1163 : AFUB_051320	38	5.80406	2.23624	3.86971	43	4.24568	1.84255	2.7068	yes
Afu5g02810	Afu5g02810	Predicted DDE1 transposon-related ORF	94	21.6652	3.18151	18.5115	67	9.10043	2.23979	7.11858	no
Afu5g02840	Afu5g02840	Has domain(s) with predicted transmembrane transporter activity, role in transmembrane transport and integral component of membrane, membrane localization	76	9.26703	2.14485	6.99799	83	12.9772	2.45902	10.7547	no
Afu5g03290	Afu5g03290	Ortholog of A. nidulans FGSC A4 : AN8197, A. niger CBS 513.88 : An09g05540, A. oryzae RIB40 : AO090102000532, Aspergillus wentii : Aspwe1_0115831 and Aspergillus sydowii : Aspsy1_0211779	74	19.3669	3.43092	16.3728	63	9.06511	2.29555	7.0855	yes
Afu5g03430	Afu5g03430	Ortholog(s) have histone demethylase activity (H3-trimethyl-K4 specific) activity	59	13.9072	3.09917	11.2891	101	24.8776	3.35968	22.1001	yes
Afu5g03710	Afu5g03710	Ortholog of A. nidulans FGSC A4 : AN8235, A. niger CBS 513.88 : An09g06450, A. oryzae RIB40 : AO090102000581, Aspergillus wentii : Aspwe1_0043078 and Aspergillus sydowii : Aspsy1_0161939	55	12.1551	2.93809	9.66063	71	14.2311	2.82353	11.9401	no
Afu5g03730	Afu5g03730	Protein of unknown function; calcium induced	77	18.0026	3.16302	15.102	158	39.1637	3.46707	35.8369	no
Afu5g03760	chiA1	Putative class III chitinase; predicted GPI-anchoring sequence; protein and transcript repressed by caspofungin treatment	84	26.1519	4.00943	22.6966	84	13.4029	2.48975	11.1569	yes
Afu5g03790	fetC	Putative ferroxidase; expression upregulated under low iron conditions; SrbA-regulated during hypoxia	57	12.3966	2.91751	9.88237	83	20.7534	3.34661	18.146	yes
Afu5g03800	ftrA	Putative high-affinity iron permease; expression upregulated under low iron conditions; SrbA-regulated during hypoxia	57	12.3966	2.91751	9.88237	83	20.7534	3.34661	18.146	yes
Afu5g04180	Afu5g04180	Transcript up-regulated in conidia exposed to neutrophils	65	14.3526	2.98913	11.7037	54	5.01429	1.84193	3.38579	no
Afu5g04220	Afu5g04220	Ortholog(s) have DNA binding, tricarboxylate secondary active transmembrane transporter activity and role in alpha-ketoglutarate transport, mitochondrial citrate transmembrane transport, mitochondrial genome maintenance	81	16.3174	2.86513	13.5271	96	18.4221	2.81159	15.9225	no
Afu5g04290	Afu5g04290	WW domain protein; calcium induced; transcript induced by exposure to human airway epithelial cells	33	3.98277	1.94508	2.30307	73	15.659	2.96237	13.2915	no
Afu5g05770	Afu5g05770	1,3-beta-glucan synthase; predicted role in cell wall biogenesis; no human homolog	55	10.2748	2.63158	7.92288	73	12.9653	2.62225	10.7434	no
Afu5g05860	Afu5g05860	Ortholog of A. nidulans FGSC A4 : AN8839, A. niger CBS 513.88 : An17g02060, Aspergillus wentii : Aspwe1_0099757 and Aspergillus sydowii : Aspsy1_0159021	51	5.17386	1.90058	3.31854	104	17.4615	2.60288	15.0062	no
Afu5g05950	Afu5g05950	Ortholog(s) have role in actin filament organization, hyphal growth, mitotic actomyosin contractile ring assembly, small GTPase mediated signal transduction, syncytium formation by plasma membrane fusion	52	7.21114	2.20833	5.12786	162	50.0718	4.17093	46.4031	yes
Afu5g05960	Afu5g05960	Putative serine/threonine protein kinase	56	6.65976	2.06223	4.6329	87	6.52795	1.76565	4.74548	yes
Afu5g06050	Afu5g06050	Putative mannosyltransferase with a predicted role in glycosylphosphatidylinositol (GPI)-anchor biosynthesis; 10 predicted transmembrane domains	56	10.4909	2.64133	8.12292	67	8.6343	2.18089	6.6859	no
Afu5g06240	alcC	Putative zinc-dependent alcohol dehydrogenase, involved in ethanol fermentation; predicted gene pair with adh1; protein induced by hydrogen peroxide; reacts with rabbit immunosera exposed to A. fumigatus conidia	63	15.3865	3.2032	12.6627	57	9.72154	2.5	7.69525	no
Afu5g06570	Afu5g06570	Ortholog of A. nidulans FGSC A4 : AN2257, A. fumigatus Af293 : Afu3g14870, A. niger CBS 513.88 : An17g01080 and Neosartorya fischeri NRRL 181 : NFIA_036550, NFIA_062380	64	10.2068	2.43263	7.86184	60	10.6655	2.57601	8.57888	no
Afu5g06660	Afu5g06660	UPF0187 domain membrane protein; transcript induced by exposure to human airway epithelial cells	58	14.8501	3.28874	12.1657	161	58.1828	4.83582	54.2336	no
Afu5g06910	Afu5g06910	Has domain(s) with predicted carbon-sulfur lyase activity and role in metabolic process	43	9.24425	2.79588	6.97672	66	14.2146	2.94259	11.9245	no
Afu5g06970	Afu5g06970	Ortholog of A. nidulans FGSC A4 : AN10975, A. niger CBS 513.88 : An17g00170, A. oryzae RIB40 : AO090701000290, Aspergillus versicolor : Aspve1_0135244 and Aspergillus clavatus NRRL 1 : ACLA_010110	51	9.86391	2.66667	7.54593	75	14.4358	2.76364	12.1342	yes
Afu5g07090	Afu5g07090	Ortholog of A. nidulans FGSC A4 : AN2216, A. niger CBS 513.88 : An17g00310, A. oryzae RIB40 : AO090701000273, Aspergillus wentii : Aspwe1_0035021 and Aspergillus sydowii : Aspsy1_0142341	42	8.76458	2.73234	6.53748	58	10.4701	2.59123	8.395	no
Afu5g07450	Afu5g07450	Ortholog of A. nidulans FGSC A4 : AN5372, AN7785, A. fumigatus Af293 : Afu6g14060, A. niger CBS 513.88 : An08g08280, An15g02880, An12g10360 and A. oryzae RIB40 : AO090103000388, AO090701000652, AO090010000610	40	6.4427	2.319	4.43977	65	11.9206	2.64635	9.75739	no
Afu5g07620	Afu5g07620	Ortholog of A. nidulans FGSC A4 : AN3479, AN8495, AN3143, A. fumigatus Af293 : Afu3g01440, Afu3g13940, Afu4g03340 and A. niger CBS 513.88 : An13g02880, An09g04780	49	11.1579	2.95858	8.73818	63	11.8167	2.67559	9.66141	yes
Afu5g07960	Afu5g07960	Has domain(s) with predicted nucleic acid binding, zinc ion binding activity	41	6.93146	2.3918	4.87787	58	10.1649	2.5453	8.10962	yes
Afu5g08090	pyroA	Putative pyridoxine biosynthesis protein	58	13.6055	3.08255	11.0071	70	14.5664	2.89088	12.2577	no
Afu5g08200	Afu5g08200	Ortholog of A. nidulans FGSC A4 : AN11006, A. niger CBS 513.88 : An03g04400, A. oryzae RIB40 : AO090701000738, Aspergillus wentii : Aspwe1_0048123 and Aspergillus sydowii : Aspsy1_0046266	61	13.3187	2.94677	10.739	61	9.94828	2.45253	7.90851	no
Afu5g08420	sho1	Putative transmembrane osmosensor with homology to S. cerevisiae Sho1p; required for normal hyphal growth, condial germination, actin distribution and the response to oxidative stress; not required for invasive pulmonary infection	34	4.04306	1.94013	2.35495	82	16.3987	2.8542	13.9945	no
Afu5g08630	Afu5g08630	Ortholog of S. cerevisiae : YIL067C, A. nidulans FGSC A4 : AN10589, A. niger CBS 513.88 : An07g04920, A. oryzae RIB40 : AO090020000423 and Aspergillus wentii : Aspwe1_0101781	41	7.97187	2.60223	5.81608	71	11.6691	2.49827	9.52157	no
Afu5g08640	Afu5g08640	Ortholog of A. nidulans FGSC A4 : AN10581, A. niger CBS 513.88 : An07g04900, Neosartorya fischeri NRRL 181 : NFIA_078640 and Aspergillus versicolor : Aspve1_0042746	41	5.40073	2.09163	3.51446	73	12.6077	2.5784	10.4055	no
Afu5g08760	Afu5g08760	Ortholog of Aspergillus fumigatus A1163 : AFUB_056290	112	18.8307	2.61695	15.8718	140	16.8099	2.21142	14.3857	yes
Afu5g08900	Afu5g08900	Putative d-arabitinol dehydrogenase	49	11.4061	3.00481	8.96819	46	5.34375	1.9966	3.67916	no
Afu5g08910	Afu5g08910	Putative 3-methylcrotonyl-CoA carboxylase subunit alpha; transcript up-regulated in conidia exposed to neutrophils	49	11.4061	3.00481	8.96819	46	5.34375	1.9966	3.67916	no
Afu5g09330	cipC	CipC-like, hyphal-specific protein; not concanamycin A or stress induced as it is in A. nidulans; reacts with rabbit immunosera exposed to A. fumigatus conidia	66	15.2254	3.08756	12.5127	91	21.6325	3.24629	18.9869	no
Afu5g09420	Afu5g09420	Has domain(s) with predicted transcription corepressor activity	71	22.5764	4.01786	19.3572	76	17.9021	3.17657	15.426	no
Afu5g09630	Afu5g09630	Ortholog of A. nidulans FGSC A4 : AN8798, A. niger CBS 513.88 : An07g03250, A. oryzae RIB40 : AO090020000592, Aspergillus wentii : Aspwe1_0023820 and Aspergillus sydowii : Aspsy1_0159494	60	10.2136	2.51029	7.86827	78	11.2158	2.33728	9.09539	no
Afu5g09910	Afu5g09910	Putative p-nitroreductase family protein; protein induced by heat shock; Yap1-dependent induction in response to hydrogen peroxide; induced by gliotoxin exposure	56	12.5071	2.96566	9.98453	42	3.67263	1.74797	2.21207	no
Afu5g09920	Afu5g09920	Has domain(s) with predicted hydrolase activity and role in metabolic process	40	6.20036	2.27021	4.22115	42	4.26729	1.85986	2.72618	yes
Afu5g09990	Afu5g09990	Has domain(s) with predicted DNA binding, DNA-binding transcription factor activity, RNA polymerase II-specific, zinc ion binding activity and role in regulation of transcription, DNA-templated, transcription, DNA-templated	59	13.248	2.99401	10.6725	98	25.6232	3.51064	22.8187	yes
Afu5g10490	Afu5g10490	Amidase; secreted protein; fibrinogen-binding	41	7.13934	2.43337	5.06341	89	20.0457	3.11634	17.4717	yes
Afu5g10660	Afu5g10660	Pentatricopeptide repeat protein; transcript induced by exposure to human airway epithelial cells	167	66.4356	5.35373	61.4499	207	79.7807	5.23402	75.1693	no
Afu5g10890	Afu5g10890	Ortholog(s) have 3'-5' DNA/RNA helicase activity, ATP-dependent four-way junction helicase activity, DNA replication origin binding and single-stranded DNA binding, more	67	19.0417	3.6286	16.07	75	16.2477	2.98977	13.8498	no
Afu5g10910	Afu5g10910	Ortholog of A. nidulans FGSC A4 : AN0227, A. fumigatus Af293 : Afu3g12020, Afu4g06275, A. niger CBS 513.88 : An14g03700, An04g00590, An02g07840 and A. oryzae RIB40 : AO090010000440, AO090023000963	67	19.0417	3.6286	16.07	75	16.2477	2.98977	13.8498	no
Afu5g10950	Afu5g10950	Ortholog of A. nidulans FGSC A4 : AN0213, A. niger CBS 513.88 : An14g02320, A. oryzae RIB40 : AO090010000435, Aspergillus wentii : Aspwe1_0440942 and Aspergillus sydowii : Aspsy1_0085799	100	32.496	4.22948	28.7153	112	27.3242	3.3591	24.4576	no
Afu5g11180	Afu5g11180	Ortholog of Aspergillus fumigatus A1163 : AFUB_058750	83	12.7898	2.43902	10.2474	90	10.5599	2.13215	8.47967	no
Afu5g11190	Afu5g11190	Ortholog(s) have role in positive regulation of asexual sporulation resulting in formation of a cellular spore, positive regulation of secondary metabolite biosynthetic process and plasma membrane localization	97	21.084	3.05868	17.9683	122	29.1033	3.32073	26.1682	no
Afu5g11290	Afu5g11290	Ortholog(s) have D-amino-acid oxidase activity and role in D-alanine metabolic process, D-valine metabolic process	40	6.08865	2.24781	4.12449	67	12.9251	2.73973	10.7051	yes
Afu5g11380	Afu5g11380	Putative Rho-GDP dissociation inhibitor; transcript and protein levels increased in response to amphotericin B	39	5.29473	2.1097	3.42145	66	11.6942	2.59489	9.54535	no
Afu5g11750	Afu5g11750	Putative LON domain serine protease; transcript up-regulated in conidia exposed to neutrophils	47	9.90046	2.7907	7.57954	61	10.8794	2.58549	8.78007	yes
Afu5g12035	Afu5g12035	Ortholog of A. nidulans FGSC A4 : AN7644, A. fumigatus Af293 : Afu2g00625, A. niger CBS 513.88 : An18g06380 and A. oryzae RIB40 : AO090012000357, AO090001000307	72	19.1325	3.463	16.1561	118	33.0068	3.75631	29.9134	no
Afu5g12150	Afu5g12150	Ortholog(s) have cytoplasm, plasma membrane localization	56	10.1383	2.58621	7.79864	95	20.2513	3.01318	17.6676	yes
Afu5g12350	Afu5g12350	Ortholog(s) have CDP reductase activity, role in CDP metabolic process, dCDP biosynthetic process and nucleus, ribonucleoside-diphosphate reductase complex localization	59	10.102	2.51467	7.76503	65	6.24183	1.90092	4.48595	no
Afu5g12410	Afu5g12410	Ortholog of S. cerevisiae : YLR326W, A. nidulans FGSC A4 : AN0061, A. oryzae RIB40 : AO090120000361, Aspergillus wentii : Aspwe1_0026696 and Aspergillus sydowii : Aspsy1_0103462	59	10.102	2.51467	7.76503	69	12.5652	2.64951	10.3649	no
Afu5g12420	Afu5g12420	Ortholog(s) have P-body localization	59	10.102	2.51467	7.76503	69	12.5652	2.64951	10.3649	no
Afu5g12530	Afu5g12530	Ortholog(s) have ubiquitin protein ligase binding activity, role in positive regulation of receptor internalization, protein ubiquitination, ubiquitin-dependent endocytosis and Golgi apparatus, cytosol, plasma membrane localization	50	6.23701	2.08504	4.25458	120	34.6891	3.86581	31.5295	no
Afu5g13160	Afu5g13160	Has domain(s) with predicted role in transmembrane transport and integral component of membrane localization	43	9.03424	2.75344	6.78531	106	31.4813	3.92229	28.4493	no
Afu5g13300	pep1	Putative extracellular aspartic endopeptidase; acid protease; predicted signal sequence for secretion; allergen Asp f 10; transcript induced by growth on hydrogen peroxide and by growth on BSA as a sole nitrogen source	43	9.03424	2.75344	6.78531	64	12.4682	2.74493	10.2731	yes
Afu5g13340	ptcG	Ortholog(s) have MAP kinase serine/threonine phosphatase activity, magnesium-dependent protein serine/threonine phosphatase activity	40	7.83462	2.60525	5.6902	57	10.033	2.54731	7.98618	yes
Afu5g13550	Afu5g13550	Ortholog of Aspergillus fumigatus A1163 : AFUB_061250	60	13.2264	2.96116	10.6529	56	7.51885	2.18894	5.65619	no
Afu5g13710	Afu5g13710	Putative carboxylesterase	55	15.3975	3.50438	12.6731	63	12.7603	2.81083	10.5491	no
Afu5g14020	Afu5g14020	Ortholog(s) have nuclear periphery localization	52	12.2699	3.05652	9.76664	76	17.1501	3.08	14.7096	no
Afu5g14660	Afu5g14660	Ortholog of A. nidulans FGSC A4 : AN3345, AN3347, A. fumigatus Af293 : Afu5g00710, A. niger CBS 513.88 : An16g06090, An12g10000/gabA and A. oryzae RIB40 : AO090166000026, AO090005000509, AO090005001081	70	17.8804	3.34906	14.9865	102	31.3798	4.03289	28.3525	yes
Afu5g14890	Afu5g14890	Ortholog of A. nidulans FGSC A4 : AN4143, AN12170, A. fumigatus Af293 : Afu1g00760, Aspergillus wentii : Aspwe1_0177868, Aspwe1_0403846 and Aspergillus niger ATCC 1015 : 41666-mRNA	35	5.69171	2.28754	3.76844	85	15.5726	2.7061	13.2091	no
Afu5g14930	Afu5g14930	Protein of unknown function; predicted gene pair with AFUA_1G16030	53	8.33821	2.36842	6.14892	82	11.4921	2.31456	9.35464	no
Afu5g15030	Afu5g15030	Putative Arsenic resistance protein; predicted gene pair with AFUA_1G16120	70	25.136	4.48799	21.7464	189	96.8305	7.27412	91.7701	no
Afu6g00620	Afu6g00620	Putative GPI-anchored protein	85	25.7825	3.92336	22.351	154	58.6157	5.0853	54.6496	no
Afu6g00630	Afu6g00630	Major facilitator superfamily (MFS) transporter	66	13.2894	2.81276	10.7115	80	12.2904	2.42806	10.1054	no
Afu6g00640	Afu6g00640	Ortholog of A. nidulans FGSC A4 : AN6413, AN6419, AN6946, AN5312, AN5664, AN8328, AN3241, AN10369, AN1930, AN2386, AN1738, AN11159, AN8984, AN8951, AN1540, AN8971, AN9387, AN9266, AN9306, AN1317, AN10886, AN7232, AN7774, AN12202	66	13.2894	2.81276	10.7115	80	12.2904	2.42806	10.1054	no
Afu6g00680	Afu6g00680	Has domain(s) with predicted role in mycotoxin biosynthetic process	35	5.69171	2.28754	3.76844	108	32.9359	4.01917	29.8451	yes
Afu6g01840	Afu6g01840	Has domain(s) with predicted DNA binding, DNA-binding transcription factor activity, RNA polymerase II-specific, zinc ion binding activity and role in regulation of transcription, DNA-templated, transcription, DNA-templated	57	16.2232	3.56704	13.4421	77	19.146	3.3107	16.6136	no
Afu6g01880	Afu6g01880	Protein of unknown function	43	8.98307	2.74314	6.73906	80	21.719	3.55745	19.0691	no
Afu6g01910	Afu6g01910	Has domain(s) with predicted nucleic acid binding activity	60	8.64389	2.28636	6.42829	80	9.01723	2.0748	7.04066	no
Afu6g02010	Afu6g02010	Secreted protein of unknown function	73	17.0958	3.15162	14.2538	61	8.05784	2.18927	6.15213	no
Afu6g02110	Afu6g02110	Has domain(s) with predicted DNA binding, protein dimerization activity	88	25.676	3.80667	22.2523	92	19.2079	2.96367	16.6726	no
Afu6g02270	Afu6g02270	Ortholog(s) have ribonuclease MRP activity, ribonuclease P activity, tRNA binding activity	56	12.1389	2.9052	9.64558	54	7.10526	2.15856	5.27624	no
Afu6g02280	aspf3	Allergen Asp f 3; peroxiredoxin family reductase; putative peroxismal membrane protein; IgE binding; protein induced by heat shock and by exposure to hydrogen peroxide; hypoxia induced protein; induced by gliotoxin exposure	56	12.1389	2.9052	9.64558	54	7.10526	2.15856	5.27624	no
Afu6g02330	Afu6g02330	Has domain(s) with predicted DNA-binding transcription factor activity, RNA polymerase II-specific, zinc ion binding activity, role in regulation of transcription, DNA-templated and nucleus localization	93	26.5682	3.75699	23.0868	121	26.0318	3.08081	23.2133	no
Afu6g02340	Afu6g02340	Ortholog of A. nidulans FGSC A4 : AN8695, Neosartorya fischeri NRRL 181 : NFIA_048600, Aspergillus wentii : Aspwe1_0035776 and Aspergillus versicolor : Aspve1_0055004	62	13.0346	2.87671	10.4743	69	8.50752	2.13936	6.56836	yes
Afu6g02570	Afu6g02570	Has domain(s) with predicted methyltransferase activity	49	11.8399	3.08642	9.36775	47	6.08174	2.10812	4.33892	no
Afu6g02800	Afu6g02800	Putative glycosylphosphatidylinositol (GPI)-anchored protein; transcript up-regulated in hyphae upon exposure to neutrophils	96	35.8885	4.82107	31.9515	161	63.7037	5.31148	59.5581	no
Afu6g02810	Afu6g02810	Putative low-affinity copper transporter; transcript up-regulated in hyphae upon exposure to neutrophils	53	10.2352	2.67592	7.88622	62	7.81058	2.1414	5.92468	no
Afu6g02930	Afu6g02930	Ortholog of A. nidulans AN8766; calcium induced	36	4.79743	2.06704	2.9933	101	24.092	3.27974	21.3432	no
Afu6g03400	Afu6g03400	Transcript up-regulated in conidia exposed to neutrophils	120	42.7504	4.67904	38.4593	97	18.6894	2.82096	16.1782	no
Afu6g03420	Afu6g03420	Putative trehalase phosphorylase with a predicted role in the glucose-1-phosphate pathway; stuA-dependent up-regulation in developmentally competent hyphae	72	15.3473	2.94592	12.626	112	27.1316	3.34122	24.273	no
Afu6g03600	Afu6g03600	Ortholog of A. nidulans FGSC A4 : AN6413, AN6419, AN6946, AN5312, AN5664, AN8328, AN3241, AN10369, AN1930, AN2386, AN1738, AN11159, AN8984, AN8951, AN1540, AN8971, AN9387, AN9266, AN9306, AN1317, AN10886, AN7232, AN7774, AN12202	76	24.9086	4.15767	21.5349	94	26.8594	3.76089	24.0106	no
Afu6g03680	Afu6g03680	Protein of unknown function; calcium induced	72	22.6993	3.99344	19.4736	157	59.5987	5.07712	55.6014	no
Afu6g03690	ena1	Putative P-type ATPase sodium pump; predicted gene pair with AFUA_4G09440	51	10.9071	2.84775	8.50606	66	11.8447	2.61514	9.68608	no
Afu6g04020	Afu6g04020	Has domain(s) with predicted translation release factor activity and role in translational termination	37	4.54373	1.9937	2.77152	80	16.713	2.93266	14.2936	yes
Afu6g04280	Afu6g04280	Ortholog of Neosartorya fischeri NRRL 181 : NFIA_050810, Aspergillus fumigatus A1163 : AFUB_094010 and Aspergillus clavatus NRRL 1 : ACLA_096320	56	11.1671	2.74831	8.74714	68	12.9802	2.72512	10.7575	no
Afu6g04600	Afu6g04600	Ortholog of A. nidulans FGSC A4 : AN6560, A. niger CBS 513.88 : An15g00728, A. oryzae RIB40 : AO090701000086, Aspergillus wentii : Aspwe1_0324754 and Aspergillus sydowii : Aspsy1_0037161	41	5.64269	2.13849	3.72955	76	11.5333	2.40175	9.39351	yes
Afu6g04880	Afu6g04880	Ortholog of A. nidulans FGSC A4 : AN6529, A. niger CBS 513.88 : An15g00440, A. oryzae RIB40 : AO090701000051, Aspergillus wentii : Aspwe1_0326252 and Aspergillus sydowii : Aspsy1_0164130	52	11.9205	2.99435	9.44229	85	18.568	3.03887	16.0623	no
Afu6g04890	Afu6g04890	Has domain(s) with predicted membrane localization	52	11.9205	2.99435	9.44229	85	18.568	3.03887	16.0623	no
Afu6g05190	Afu6g05190	Ortholog of S. cerevisiae : YCL012C, A. nidulans FGSC A4 : AN10827, A. niger CBS 513.88 : An15g00090, A. oryzae RIB40 : AO090701000015 and Aspergillus wentii : Aspwe1_0105865	84	23.3254	3.6387	20.0586	64	9.35325	2.31812	7.35249	no
Afu6g05200	Afu6g05200	60S ribosomal protein L28	84	23.3254	3.6387	20.0586	64	9.35325	2.31812	7.35249	no
Afu6g06335	Afu6g06335	Ortholog(s) have RNA binding, histone methyltransferase activity (H3-K4 specific) activity	39	5.77674	2.20751	3.8451	115	29.9455	3.53874	26.9778	yes
Afu6g06340	gfa1	Ortholog(s) have glutamine-fructose-6-phosphate transaminase (isomerizing) activity	39	5.77674	2.20751	3.8451	115	29.9455	3.53874	26.9778	no
Afu6g06770	aspf22	Putative enolase; allergen Asp f 22; conidia-enriched protein; transcript induced by growth on hydrogen peroxide; hypoxia induced protein; transcript induced by exposure to human airway epithelial cells	56	9.08102	2.42347	6.82787	69	11.4736	2.50896	9.3374	no
Afu6g06800	Afu6g06800	Putative peptidase; predicted signal sequence for secretion; induced by growth on BSA as a sole nitrogen source	52	9.26652	2.54075	6.99752	67	11.3218	2.526	9.19566	no
Afu6g06830	srb5	RNA polymerase II mediator complex subunit; transcript up-regulated in conidia exposed to neutrophils	95	25.3157	3.55556	21.912	103	23.7347	3.20197	21	yes
Afu6g06860	rgsA	G-protein signal regulator with an RGS domain	90	13.6887	2.43576	11.0847	140	19.9003	2.40943	17.3342	no
Afu6g06870	Afu6g06870	Ortholog(s) have ATP binding, magnesium ion binding, protein serine/threonine kinase activity, protein tyrosine kinase activity	42	4.47728	1.89929	2.72057	88	14.9538	2.59173	12.6241	yes
Afu6g07470	Afu6g07470	Ortholog(s) have role in fungal-type cell wall organization, protein complex oligomerization and cell cortex of cell tip, membrane raft, plasma membrane localization	76	23.4795	3.94467	20.2039	200	74.5303	5.04518	70.0716	no
Afu6g07780	Afu6g07780	Has domain(s) with predicted DNA binding, DNA-binding transcription factor activity, copper ion binding activity, role in regulation of transcription, DNA-templated and nucleus localization	61	13.1543	2.92177	10.5855	99	20.7104	2.98329	18.1047	yes
Afu6g07870	Afu6g07870	Ortholog(s) have GTPase activity, calcium ion binding activity	63	16.421	3.36488	13.6236	111	33.1007	3.94922	30.0037	no
Afu6g07970	Afu6g07970	Putative calpain-like protein; calcium-dependent cysteine-type endopeptidase	40	7.6148	2.5593	5.49235	95	25.4099	3.56612	22.6134	no
Afu6g08040	Afu6g08040	Has domain(s) with predicted nucleic acid binding, nucleotide binding activity	64	14.6643	3.06315	11.9929	82	17.1889	2.94535	14.7469	no
Afu6g08260	Afu6g08260	Ortholog of A. nidulans FGSC A4 : AN3936, A. niger CBS 513.88 : An11g01830, A. oryzae RIB40 : AO090003000099, Aspergillus wentii : Aspwe1_0177057 and Aspergillus sydowii : Aspsy1_0918698	70	21.8622	3.94883	18.6964	144	52.0789	4.80769	48.3432	no
Afu6g08390	Afu6g08390	Ortholog of A. nidulans FGSC A4 : AN3925, A. niger CBS 513.88 : An11g01660, A. oryzae RIB40 : AO090001000495, Aspergillus wentii : Aspwe1_0120489 and Aspergillus sydowii : Aspsy1_0150601	44	9.00129	2.71411	6.7558	64	12.3052	2.72194	10.1193	no
Afu6g08510	crh1	Putative cell wall biosynthesis protein	58	16.3441	3.54567	13.5522	90	24.5336	3.60539	21.7688	yes
Afu6g08750	Afu6g08750	Ortholog(s) have role in hyphal growth and mitochondrion localization	35	4.87501	2.10526	3.06107	60	9.10559	2.35158	7.1234	yes
Afu6g09100	Afu6g09100	Has domain(s) with predicted catalytic activity	72	16.2449	3.06465	13.4621	63	7.26188	2.05523	5.41745	no
Afu6g09110	Afu6g09110	Ortholog(s) have L-asparagine transmembrane transporter activity, L-isoleucine transmembrane transporter activity, L-lysine transmembrane transporter activity	52	7.06181	2.18467	4.99299	71	9.02231	2.17654	7.04527	no
Afu6g09120	Afu6g09120	Ortholog of A. nidulans FGSC A4 : AN1765, A. oryzae RIB40 : AO090001000589, Neosartorya fischeri NRRL 181 : NFIA_054800, Aspergillus wentii : Aspwe1_0705131 and Aspergillus clavatus NRRL 1 : ACLA_083280	52	7.06181	2.18467	4.99299	71	9.02231	2.17654	7.04527	no
Afu6g09307	Afu6g09307	Has domain(s) with predicted catalytic activity, chitin binding, chitinase activity, hydrolase activity, hydrolyzing O-glycosyl compounds activity and role in carbohydrate metabolic process, chitin catabolic process	76	21.2686	3.62865	18.1416	98	21.9372	3.125	19.278	no
Afu6g09360	Afu6g09360	Ortholog of Aspergillus fumigatus A1163 : AFUB_092710	65	11.4806	2.58621	9.03666	118	25.4658	3.0829	22.6674	yes
Afu6g09390	Afu6g09390	Has domain(s) with predicted ATP binding, phosphotransferase activity, alcohol group as acceptor activity, role in lipopolysaccharide biosynthetic process and membrane localization	55	11.5441	2.83688	9.09505	112	32.4898	3.85929	29.4177	no
Afu6g09930	yap1	bZIP family transcription factor; required for resistance to oxidative stress; expression repressed by dexamethasone	35	5.5373	2.25282	3.63637	42	4.41993	1.88853	2.85638	no
Afu6g10080	Afu6g10080	Transcript up-regulated in conidia exposed to neutrophils	57	16.5708	3.62954	13.764	52	7.95885	2.32772	6.05968	no
Afu6g10260	akr1	Putative aldehyde reductase; abundant protein in conidia; transcript up-regulated in conidia exposed to neutrophils and to human airway epithelial cells	57	15.0488	3.36037	12.3502	126	34.8552	3.73749	31.6887	no
Afu6g10650	Afu6g10650	Putative ATP citrate lyase, subunit 1; protein induced by heat shock	47	6.41794	2.16606	4.41762	55	5.48977	1.90217	3.80731	no
Afu6g10940	Afu6g10940	Protein of unknown function; calcium induced	36	6.09852	2.35108	4.12932	83	20.972	3.37349	18.3549	no
Afu6g11300	trp2	Putative transient receptor potential Ca2+ channel family protein	35	5.35193	2.2113	3.47094	59	10.6764	2.59965	8.58933	no
Afu6g11450	Afu6g11450	Has domain(s) with predicted DNA binding, DNA-binding transcription factor activity, RNA polymerase II-specific, zinc ion binding activity and role in regulation of transcription, DNA-templated, transcription, DNA-templated	78	22.4251	3.7194	19.2179	115	34.3481	3.96446	31.2025	yes
Afu6g11455	U3	U3 snoRNA	78	22.4251	3.7194	19.2179	115	34.3481	3.96446	31.2025	no
Afu6g11460	Afu6g11460	Has domain(s) with predicted nucleic acid binding, nucleotide binding activity	78	22.4251	3.7194	19.2179	115	34.3481	3.96446	31.2025	yes
Afu6g12230	Afu6g12230	Ortholog of A. nidulans FGSC A4 : AN4257, A. fumigatus Af293 : Afu7g04010, A. niger CBS 513.88 : An13g00460, An02g13770 and A. oryzae RIB40 : AO090026000813, AO090120000195	37	6.51647	2.41463	4.50273	60	10.3717	2.53322	8.30408	no
Afu6g12340	Afu6g12340	Putative GTPase-activating protein; transcript upregulated in response to amphotericin B	68	17.394	3.34302	14.5328	50	5.86963	2.02542	4.14871	no
Afu6g12350	atgI	Ortholog(s) have role in autophagy of mitochondrion, late nucleophagy, piecemeal microautophagy of the nucleus, protein homooligomerization and protein localization by the Cvt pathway, more	68	17.394	3.34302	14.5328	50	5.86963	2.02542	4.14871	yes
Afu6g12400	fks1	Putative 1,3-beta-glucan synthase catalytic subunit, major subunit of glucan synthase; predicted transmembrane protein; essential	66	11.875	2.61923	9.40025	130	22.0209	2.65075	19.3585	yes
Afu6g12500	Afu6g12500	Ortholog(s) have unfolded protein binding activity and mitochondrion localization	64	14.4715	3.03455	11.815	58	5.37176	1.85302	3.70445	no
Afu6g12522	skn7	Putative transcription factor and response regulator of a two-component signal transduction system	64	14.4715	3.03455	11.815	58	5.37176	1.85302	3.70445	no
Afu6g12670	Afu6g12670	Has domain(s) with predicted hydrolase activity, hydrolase activity, acting on carbon-nitrogen (but not peptide) bonds, in linear amidines activity and role in metabolic process	49	8.98087	2.56674	6.73699	71	12.9955	2.66469	10.772	no
Afu6g12680	Afu6g12680	Ortholog(s) have adenosine 5'-monophosphoramidase activity and role in nucleotide metabolic process	49	8.98087	2.56674	6.73699	71	12.9955	2.66469	10.772	no
Afu6g12820	mpkB	Putative mitogen-activated protein kinase (MAPK)	39	5.74098	2.20022	3.81286	82	18.7125	3.125	16.2003	no
Afu6g12830	Afu6g12830	Ortholog(s) have endoplasmic reticulum exit site localization	39	5.74098	2.20022	3.81286	82	18.7125	3.125	16.2003	no
Afu6g12910	Afu6g12910	Ortholog(s) have role in DNA repair, ascospore formation, chromatin silencing at centromere, meiotic gene conversion, reciprocal meiotic recombination, regulation of DNA recombination at centromere	44	6.27178	2.19727	4.28609	89	17.6207	2.85352	15.1584	yes
Afu6g12920	Afu6g12920	Ortholog(s) have ribosomal large subunit binding activity, role in ribosomal large subunit export from nucleus and cytoplasm, nucleus, preribosome, large subunit precursor localization	51	8.95084	2.51208	6.70976	100	22.8715	3.1781	20.1726	no
Afu6g13180	Afu6g13180	Has domain(s) with predicted deaminase activity and role in purine ribonucleoside monophosphate biosynthetic process	64	15.7129	3.22101	12.9652	107	26.1576	3.35404	23.3342	no
Afu6g13190	Afu6g13190	Ortholog(s) have drug transmembrane transporter activity, nucleoside transmembrane transporter activity, against a concentration gradient, symporter activity and role in cellular response to drug, drug transport, uridine transport	64	15.7129	3.22101	12.9652	107	26.1576	3.35404	23.3342	yes
Afu6g13346	Afu6g13346	Ortholog(s) have role in syncytium formation by plasma membrane fusion	52	11.1461	2.85868	8.72721	53	7.25901	2.1987	5.41471	yes
Afu6g13380	Afu6g13380	Ortholog of A. nidulans FGSC A4 : AN5453/artG, A. niger CBS 513.88 : An08g09040, A. oryzae RIB40 : AO090003000465, Aspergillus wentii : Aspwe1_0047105 and Aspergillus sydowii : Aspsy1_0044061	87	20.727	3.24006	17.6373	97	21.0087	3.05106	18.3898	no
Afu6g13790	Afu6g13790	Ortholog(s) have monooxygenase activity and role in sterigmatocystin biosynthetic process	57	16.8791	3.68548	14.0506	65	13.7234	2.89867	11.4594	no
Afu6g14050	Afu6g14050	Has domain(s) with predicted UDP-N-acetylmuramate dehydrogenase activity, flavin adenine dinucleotide binding activity and role in oxidation-reduction process	38	4.79344	2.02703	2.98975	100	20.4455	2.93946	17.8531	no
Afu6g14070	Afu6g14070	Ortholog of Aspergillus fumigatus A1163 : AFUB_000670	50	6.98838	2.20779	4.92575	80	10.0342	2.18329	7.98724	no
Afu6g14200	erg10	Putative acetyl-CoA acetyltransferase; transcript up-regulated in conidia exposed to neutrophils; SrbA-regulated during hypoxia	54	13.6169	3.22392	11.0176	61	11.8237	2.72299	9.66616	no
Afu6g14510	Afu6g14510	Has domain(s) with predicted FAD binding, oxidoreductase activity and role in metabolic process	86	36.9921	5.52822	32.9971	97	32.2127	4.30408	29.1514	yes
Afu7g00130	nscR	Pathway-specific Zn(II)2Cys6 transcriptional factor; encoded within the nsc/fcc secondary metabolite gene cluster; role in neosartoricin and fumicycline A biosynthesis; induced by contact with the bacterium Streptomyces rapamycinicus	54	15.1092	3.49485	12.4045	52	7.95885	2.32772	6.05968	no
Afu7g00340	Afu7g00340	Has domain(s) with predicted hydrolase activity	50	10.4415	2.79605	8.07747	58	9.01754	2.3752	7.0409	no
Afu7g00470	Afu7g00470	Ortholog of Aspergillus niger ATCC 1015 : 189665-mRNA	36	6.09852	2.35108	4.12932	60	11.3656	2.67907	9.23526	no
Afu7g00580	Afu7g00580	Putative adhesin; expression induced in biofilm	52	13.9676	3.36777	11.3436	96	31.5581	4.26016	28.5228	no
Afu7g00930	Afu7g00930	Ortholog of A. nidulans FGSC A4 : AN6413, AN6419, AN6946, AN5312, AN5664, AN8328, AN3241, AN10369, AN1930, AN2386, AN1738, AN11159, AN8984, AN8951, AN1540, AN8971, AN9387, AN9266, AN9306, AN1317, AN10886, AN7232, AN7774, AN12202	79	28.9982	4.64576	25.3932	106	35.3913	4.35668	32.2054	no
Afu7g01600	Afu7g01600	Ortholog of A. nidulans FGSC A4 : AN11181, A. niger CBS 513.88 : An12g01100, A. oryzae RIB40 : AO090038000529, Neosartorya fischeri NRRL 181 : NFIA_114300 and Aspergillus clavatus NRRL 1 : ACLA_065970	45	6.83556	2.27948	4.79108	70	10.4217	2.36037	8.35123	no
Afu7g01695	Afu7g01695	Ortholog of A. nidulans FGSC A4 : AN9137, Aspergillus clavatus NRRL 1 : ACLA_065860, Aspergillus zonatus : Aspzo1_0012532 and Aspergillus sydowii : Aspsy1_0093862	52	12.7737	3.14727	10.2324	58	10.4701	2.59123	8.395	no
Afu7g01700	Afu7g01700	Ortholog of A. nidulans FGSC A4 : AN11178, A. niger CBS 513.88 : An12g01010, A. oryzae RIB40 : AO090038000539, Aspergillus wentii : Aspwe1_0042439 and Aspergillus terreus NIH2624 : ATET_01783	52	12.7737	3.14727	10.2324	58	10.4701	2.59123	8.395	no
Afu7g01830	ugp1	UTP-glucose-1-phosphate uridylyltransferase; induced by hydrogen peroxide; hypoxia repressed protein	41	6.44364	2.29508	4.44061	73	14.1322	2.76739	11.8478	no
Afu7g01840	Afu7g01840	Ortholog(s) have Golgi apparatus, cell tip, cytoplasmic vesicle, plasma membrane localization	80	18.829	3.18898	15.8703	165	48.0759	3.96371	44.4599	no
Afu7g01850	Afu7g01850	Ortholog(s) have RNA polymerase III activity, role in tRNA transcription by RNA polymerase III and RNA polymerase III complex, mitochondrion localization	80	18.829	3.18898	15.8703	165	48.0759	3.96371	44.4599	yes
Afu7g02570	Afu7g02570	Ortholog of A. nidulans FGSC A4 : AN9067/tinC, AN2167/hetC, A. fumigatus Af293 : Afu2g15840, A. niger CBS 513.88 : An15g06140 and A. oryzae RIB40 : AO090038000633, AO090012000230	43	6.5024	2.26105	4.49375	59	7.30016	2.11268	5.45321	no
Afu7g03880	Afu7g03880	Has domain(s) with predicted role in transmembrane transport and integral component of membrane localization	53	12.0099	2.97685	9.5254	154	63.38	5.52782	59.2416	no
Afu7g03900	Afu7g03900	Ortholog(s) have role in syncytium formation by plasma membrane fusion	49	9.02621	2.57467	6.77807	128	40.2362	4.17746	36.8668	no
Afu7g04190	Afu7g04190	Ortholog(s) have methyltransferase activity, role in cellular response to biotic stimulus, filamentous growth, glucosylceramide biosynthetic process, pathogenesis and plasma membrane localization	52	11.6376	2.94444	9.18167	49	5.77278	2.02429	4.06034	no
Afu7g04310	Afu7g04310	Ortholog(s) have protein serine/threonine kinase activity	39	6.70191	2.39808	4.67073	66	12.8547	2.75267	10.6381	no
Afu7g04590	Afu7g04590	Ortholog(s) have telomerase RNA binding, telomerase RNA reverse transcriptase activity and role in DNA strand elongation, telomere maintenance via telomerase	64	15.4845	3.18627	12.754	100	24.5277	3.34659	21.7631	no
Afu7g05220	Afu7g05220	Putative mitochondrial carrier protein	70	16.5109	3.15556	13.708	86	18.2691	2.98354	15.7773	no
Afu7g05450	sun1	Novel beta-1,3-glucan modifying enzyme involved in fungal morphogenesis	44	5.09082	1.98238	3.24544	103	18.7221	2.72966	16.2094	no
Afu7g05752	Afu7g05752	Has domain(s) with predicted ATP binding, nucleoside-triphosphatase activity, nucleotide binding activity	51	6.91048	2.17755	4.85914	68	13.9342	2.8536	11.6597	no
Afu7g05800	Afu7g05800	Ortholog(s) have fructose-2,6-bisphosphate 2-phosphatase activity and role in glucose metabolic process	40	6.3652	2.30337	4.36959	68	13.0774	2.7381	10.8502	no
Afu7g05910	uapC	Purine transporter; high-affinity, high-capacity, purine/H+ symporter; specific for xanthine, uric acid and oxypurinol	92	22.0405	3.26774	18.861	70	7.71663	2.03206	5.83711	yes
Afu7g06050	ddiA	Ortholog(s) have SNARE binding, polyubiquitin modification-dependent protein binding, ubiquitin binding activity	61	14.7972	3.17623	12.116	62	9.37428	2.35426	7.37218	no
Afu7g06060	sit1	Putative siderophore transporter; SrbA-regulated during hypoxia	61	14.7972	3.17623	12.116	62	9.37428	2.35426	7.37218	no
Afu7g06100	Afu7g06100	Putative acyl-coA dehydrogenase family protein with a predicted role in beta oxidation of fatty acids; transcript up-regulated in conidia exposed to neutrophils	50	12.858	3.24068	10.3093	57	10.033	2.54731	7.98618	no
Afu7g06120	Afu7g06120	Putative transmembrane transporter	43	9.24425	2.79588	6.97672	66	14.2146	2.94259	11.9245	no
Afu7g06130	Afu7g06130	Ortholog of A. nidulans FGSC A4 : AN6413, AN6419, AN6946, AN5312, AN5664, AN8328, AN3241, AN10369, AN1930, AN2386, AN1738, AN11159, AN8984, AN8951, AN1540, AN8971, AN9387, AN9266, AN9306, AN1317, AN10886, AN7232, AN7774, AN12202	43	9.24425	2.79588	6.97672	66	14.2146	2.94259	11.9245	no
Afu7g06320	Afu7g06320	Has domain(s) with predicted DNA binding, DNA-binding transcription factor activity, RNA polymerase II-specific, zinc ion binding activity and role in regulation of transcription, DNA-templated, transcription, DNA-templated	42	8.76458	2.73234	6.53748	69	15.7259	3.07434	13.3537	no
Afu7g06380	Afu7g06380	Putative maltase	76	27.867	4.62185	24.3202	113	42.3259	4.89691	38.891	yes
Afu7g08231	Afu7g08231	Ortholog of Aspergillus fumigatus A1163 : AFUB_080320	75	11.0592	2.36172	8.64649	95	8.64896	1.91388	6.69963	no
Afu7g08520	Afu7g08520	Ortholog of Aspergillus fumigatus A1163 : AFUB_097650, AFUB_098020	88	15.19	2.61611	12.4801	92	5.21837	1.61234	3.56539	no
Afu7g08530	Afu7g08530	Ortholog of A. niger CBS 513.88 : An10g00280, Aspergillus tubingensis : Asptu1_0053817, Aspergillus fumigatus A1163 : AFUB_097670, AFUB_098030 and Aspergillus sydowii : Aspsy1_0041373	88	15.19	2.61611	12.4801	92	5.21837	1.61234	3.56539	yes
Afu7g08540	Afu7g08540	Ortholog of Aspergillus fumigatus A1163 : AFUB_097680, AFUB_098040	106	29.2486	3.68711	25.6318	156	40.5934	3.59927	37.2118	no
Afu8g00410	metAP	Methionine aminopeptidase type II; required for mycotoxin synthesis; induced by growth on BSA as a sole nitrogen source; encoded in the fma (fumagillin) secondary metabolite gene cluster	34	5.29631	2.224	3.42145	71	16.7639	3.16218	14.3416	yes
Afu8g01260	Afu8g01260	Protein of unknown function; transcript induced by voriconazole	49	9.88294	2.72628	7.56371	141	52.8235	4.97547	49.063	no
Afu8g01300	Afu8g01300	Ortholog of A. nidulans FGSC A4 : AN1465, AN8786, A. fumigatus Af293 : Afu8g04560, A. niger CBS 513.88 : An16g08420 and Aspergillus wentii : Aspwe1_0030845	62	19.6867	3.95232	16.6739	98	32.8717	4.348	29.7831	yes
Afu8g01560	Afu8g01560	Putative aldo-keto reductase; predicted gene pair with AFUA_1G15970	38	6.94531	2.47817	4.88673	58	10.4701	2.59123	8.395	no
Afu8g02030	Afu8g02030	Ortholog of A. oryzae RIB40 : AO090038000195, AO090012000751, Aspergillus flavus NRRL 3357 : AFL2T_03620, Neosartorya fischeri NRRL 181 : NFIA_095700 and Aspergillus wentii : Aspwe1_0032065	73	17.2978	3.17869	14.4427	70	10.0466	2.31421	7.99876	no
Afu8g02070	Afu8g02070	Ortholog of A. niger CBS 513.88 : An05g02310, A. oryzae RIB40 : AO090010000612, Neosartorya fischeri NRRL 181 : NFIA_095740 and Aspergillus clavatus NRRL 1 : ACLA_043710	84	24.5608	3.79803	21.2123	133	28.3894	3.08046	25.4813	no
Afu8g02110	Afu8g02110	Ortholog of Aspergillus fumigatus A1163 : AFUB_084500	69	22.3941	4.07925	19.1894	198	88.8291	6.18781	83.9192	no
Afu8g02190	Afu8g02190	Ortholog of Aspergillus fumigatus A1163 : AFUB_084420	49	11.4255	3.00842	8.9862	79	21.1465	3.51354	18.5214	no
Afu8g02720	Afu8g02720	Ortholog of A. niger CBS 513.88 : An03g06820, A. oryzae RIB40 : AO090010000763, Aspergillus wentii : Aspwe1_0177783, Aspergillus sydowii : Aspsy1_0050811 and Aspergillus terreus NIH2624 : ATET_10385	65	14.075	2.94906	11.4446	76	12.9227	2.56325	10.7028	yes
Afu8g04050	Afu8g04050	Putative DNA binding transcription factor; predicted gene pair with AFUA_1G00580	56	5.41403	1.87995	3.52623	105	10.2064	1.97909	8.14883	no
Afu8g04060	Afu8g04060	Ortholog(s) have H3 histone acetyltransferase activity	100	39.6287	5.13733	35.5114	175	76.2756	5.94193	71.7698	no
Afu8g04070	Afu8g04070	Putative glucosamine-6-phosphate deaminase; transcript up-regulated in conidia exposed to neutrophils	100	39.6287	5.13733	35.5114	175	76.2756	5.94193	71.7698	no
Afu8g04100	Afu8g04100	Putative N-acetylglucosamine-6-phosphate deacetylase; predicted gene pair with AFUA_1G00450; transcript up-regulated in conidia exposed to neutrophils	38	6.94531	2.47817	4.88673	70	16.2419	3.11826	13.8445	yes
Afu8g04130	farB1	Putative C6 transcription factor with a predicted role in beta oxidation of fatty acids; transcript up-regulated in conidia exposed to neutrophils	93	31.0035	4.30403	27.2925	131	40.5938	4.13016	37.2121	no
Afu8g04170	Afu8g04170	Ortholog of A. nidulans FGSC A4 : AN1421, A. niger CBS 513.88 : An16g08920, A. oryzae RIB40 : AO090103000032, Aspergillus wentii : Aspwe1_0043825 and Aspergillus sydowii : Aspsy1_0041969	61	17.4152	3.60465	14.553	74	13.1339	2.62421	10.9037	no
Afu8g04300	Afu8g04300	Ortholog of A. nidulans FGSC A4 : AN1437, A. niger CBS 513.88 : An16g08780, A. oryzae RIB40 : AO090103000047, Aspergillus wentii : Aspwe1_0175158 and Aspergillus sydowii : Aspsy1_0144982	36	4.76538	2.06013	2.96561	63	10.6196	2.50784	8.53567	no
Afu8g04550	Afu8g04550	Has domain(s) with predicted catalytic activity and role in coenzyme M biosynthetic process	50	8.52455	2.46377	6.3197	76	14.6204	2.7658	12.3085	no
Afu8g04890	Afu8g04890	Ortholog(s) have role in response to salt stress	46	7.72299	2.4177	5.59034	71	13.1675	2.68657	10.9353	no
Afu8g05010	zfpA	Putative C2H2 zinc-finger transcription factor; transcript induced by voriconazole and calcium	68	9.35725	2.25785	7.0815	140	16.5061	2.19216	14.0966	yes
Afu8g05165	Afu8g05165	Protein of unknown function	60	10.5913	2.56518	8.21556	91	16.7233	2.72512	14.3035	no
Afu8g05470	Afu8g05470	Ortholog of Aspergillus fumigatus A1163 : AFUB_082079	67	15.5655	3.10786	12.8292	66	8.82238	2.21854	6.85909	no
Afu8g05600	Afu8g05600	Ortholog of A. nidulans FGSC A4 : AN1549, A. niger CBS 513.88 : An16g07080, A. oryzae RIB40 : AO090005000583, Aspergillus wentii : Aspwe1_0187131 and Aspergillus sydowii : Aspsy1_0086712	100	24.1441	3.30714	20.8262	110	22.9091	2.99514	20.2084	no
Afu8g05620	chs3	Ortholog(s) have enzyme activator activity and role in cellular protein localization, division septum assembly, fungal-type cell wall chitin biosynthetic process, regulation of fungal-type cell wall beta-glucan biosynthetic process	55	7.69049	2.23108	5.56117	105	16.4124	2.49882	14.0076	no
Afu8g05660	Afu8g05660	Ortholog(s) have actin filament binding, actin-dependent ATPase activity, microfilament motor activity	37	6.14606	2.33415	4.17248	82	20.1451	3.29889	17.5662	no
Afu8g05710	mfsA	Putative major facilitator superfamily (MFS) sugar transporter; calcium induced; transcript up-regulated in conidia exposed to neutrophils	52	10.8306	2.80423	8.43475	112	32.9906	3.91003	29.898	no
Afu8g05970	Afu8g05970	Ortholog of A. nidulans FGSC A4 : AN5283, AN2708, AN1572, AN7419, A. fumigatus Af293 : Afu6g14000, A. niger CBS 513.88 : An07g02380, An08g07270 and A. oryzae RIB40 : AO090026000716, AO090005000543	51	9.5806	2.61833	7.28618	67	10.6148	2.43379	8.53102	no
Afu8g05975	Afu8g05975	Has domain(s) with predicted transferase activity, transferring phosphorus-containing groups activity	64	16.3331	3.31633	13.5416	59	9.87521	2.48139	7.83972	yes
Afu8g06554	Afu8g06554	Has domain(s) with predicted carbonate dehydratase activity, zinc ion binding activity	37	6.30727	2.36908	4.3177	63	12.0075	2.7027	9.83936	no
Afu8g06580	Afu8g06580	Ortholog of A. nidulans FGSC A4 : AN8726, A. fumigatus Af293 : Afu7g00440, Afu8g06090 and A. niger CBS 513.88 : An02g08340, An02g09540, An03g00430	41	8.29463	2.6688	6.10856	75	18.9103	3.33786	16.3887	yes
Afu8g06700	anxc3.1	Putative annexin; calcium induced	52	13.9676	3.36777	11.3436	87	25.6455	3.83609	22.8404	yes
Afu8g07070	Afu8g07070	Ortholog(s) have glucan 1,4-alpha-maltotriohydrolase activity, maltose alpha-glucosidase activity, oligo-1,6-glucosidase activity, sucrose alpha-glucosidase activity and role in maltose catabolic process, sucrose catabolic process	49	12.3156	3.17714	9.80741	57	10.033	2.54731	7.98618	no
Afu8g07190	Afu8g07190	Ortholog of A. nidulans FGSC A4 : AN9163, A. niger CBS 513.88 : An14g07150, A. oryzae RIB40 : AO090138000059, Aspergillus wentii : Aspwe1_0078799 and Aspergillus sydowii : Aspsy1_0061494	79	25.2587	4.08163	21.8599	126	41.7432	4.37931	38.3251	no
